# Supplementary material
Source: publisher figshare collection journal article supplement (https://acs.figshare.com/ndownloader/files/3940294)
Supplement: Supplementary file 1 [file 3940294]

#=====================================================================
# cif data for "mk-320-4" (compound 1)
#=====================================================================
 
data_mk-320-4
 
_audit_creation_method            SHELXL-97 
_chemical_name_systematic 
; 
 ? 
; 
_chemical_name_common             ? 
_chemical_melting_point           ? 
_chemical_formula_moiety          'C23 H21 Fe O P' 
_chemical_formula_sum 
 'C23 H21 Fe O P' 
_chemical_formula_weight          400.22 
 
loop_ 
 _atom_type_symbol 
 _atom_type_description 
 _atom_type_scat_dispersion_real 
 _atom_type_scat_dispersion_imag 
 _atom_type_scat_source 
 'C'  'C'   0.0033   0.0016 
 'International Tables Vol C Tables 4.2.6.8 and 6.1.1.4' 
 'H'  'H'   0.0000   0.0000 
 'International Tables Vol C Tables 4.2.6.8 and 6.1.1.4' 
 'O'  'O'   0.0106   0.0060 
 'International Tables Vol C Tables 4.2.6.8 and 6.1.1.4' 
 'P'  'P'   0.1023   0.0942 
 'International Tables Vol C Tables 4.2.6.8 and 6.1.1.4' 
 'Fe'  'Fe'   0.3463   0.8444 
 'International Tables Vol C Tables 4.2.6.8 and 6.1.1.4' 
 
_symmetry_cell_setting            'monoclinic' 
_symmetry_space_group_name_H-M    'P21/c' 
_symmetry_space_group_name_Hall   '-P 2ybc' 
 
loop_ 
 _symmetry_equiv_pos_as_xyz 
 'x, y, z' 
 '-x, y+1/2, -z+1/2' 
 '-x, -y, -z' 
 'x, -y-1/2, z-1/2' 
 
_cell_length_a                    8.1036(2) 
_cell_length_b                    19.4551(4) 
_cell_length_c                    12.1025(3) 
_cell_angle_alpha                 90.00 
_cell_angle_beta                  100.958(2) 
_cell_angle_gamma                 90.00 
_cell_volume                      1873.25(8) 
_cell_formula_units_Z             4 
_cell_measurement_temperature   107.1(2) 
_cell_measurement_reflns_used   4363
_cell_measurement_theta_min     3.4900
_cell_measurement_theta_max     28.7000
 
_exptl_crystal_description        'block' 
_exptl_crystal_colour             'orange' 
_exptl_crystal_size_max           0.40 
_exptl_crystal_size_mid           0.40 
_exptl_crystal_size_min           0.20 
_exptl_crystal_density_meas       ? 
_exptl_crystal_density_diffrn     1.419 
_exptl_crystal_density_method     'not measured' 
_exptl_crystal_F_000              832 
_exptl_absorpt_coefficient_mu     0.899 
_exptl_absorpt_correction_type    'multi-scan' 
_exptl_absorpt_correction_T_min   0.7150 
_exptl_absorpt_correction_T_max   0.8407 
_exptl_absorpt_process_details
;
CrysAlisPro, Agilent Technologies,
Version 1.171.36.28 (release 01-02-2013 CrysAlis171 .NET)
(compiled Feb  1 2013,16:14:44)
Empirical absorption correction using spherical harmonics,
 implemented in SCALE3 ABSPACK scaling algorithm.
;
 
_exptl_special_details 
; 
 ? 
; 
 
_diffrn_ambient_temperature       107.1(2)
_diffrn_radiation_wavelength      0.71073 
_diffrn_radiation_type            MoK\a 
_diffrn_radiation_source          'fine-focus sealed tube' 
_diffrn_radiation_monochromator   graphite 
_diffrn_measurement_device_type   'oxford gemini s' 
_diffrn_measurement_method        '\w scans' 
_diffrn_detector_area_resol_mean  ? 
_diffrn_standards_number          2 
_diffrn_standards_interval_count  50 
_diffrn_standards_interval_time   10 
_diffrn_standards_decay_%         0 
_diffrn_reflns_number             8695 
_diffrn_reflns_av_R_equivalents   0.0240 
_diffrn_reflns_av_sigmaI/netI     0.0323 
_diffrn_reflns_limit_h_min        -9 
_diffrn_reflns_limit_h_max        9 
_diffrn_reflns_limit_k_min        -23 
_diffrn_reflns_limit_k_max        23 
_diffrn_reflns_limit_l_min        -14 
_diffrn_reflns_limit_l_max        14 
_diffrn_reflns_theta_min          2.99 
_diffrn_reflns_theta_max          25.99 
_reflns_number_total              3655 
_reflns_number_gt                 3170 
_reflns_threshold_expression      >2sigma(I) 
 
_computing_data_collection
;
CrysAlisPro, Agilent Technologies,
Version 1.171.36.28 (release 01-02-2013 CrysAlis171 .NET)
(compiled Feb  1 2013,16:14:44)
;
_computing_cell_refinement
;
CrysAlisPro, Agilent Technologies,
Version 1.171.36.28 (release 01-02-2013 CrysAlis171 .NET)
(compiled Feb  1 2013,16:14:44)
;
_computing_data_reduction
;
CrysAlisPro, Agilent Technologies,
Version 1.171.36.28 (release 01-02-2013 CrysAlis171 .NET)
(compiled Feb  1 2013,16:14:44)
;
_computing_structure_solution     'SHELXS-97 (Sheldrick, 1990)' 
_computing_structure_refinement   'SHELXL-97 (Sheldrick, 1997)' 
_computing_molecular_graphics     ? 
_computing_publication_material   ? 
 
_refine_special_details 
; 
 Refinement of F^2^ against ALL reflections.  The weighted R-factor wR and 
 goodness of fit S are based on F^2^, conventional R-factors R are based 
 on F, with F set to zero for negative F^2^. The threshold expression of 
 F^2^ > 2sigma(F^2^) is used only for calculating R-factors(gt) etc. and is 
 not relevant to the choice of reflections for refinement.  R-factors based 
 on F^2^ are statistically about twice as large as those based on F, and R- 
 factors based on ALL data will be even larger. 
; 
 
_refine_ls_structure_factor_coef  Fsqd  
_refine_ls_matrix_type            full 
_refine_ls_weighting_scheme       calc  
_refine_ls_weighting_details 
 'calc w=1/[\s^2^(Fo^2^)+(0.0283P)^2^+0.8958P] where P=(Fo^2^+2Fc^2^)/3' 
_atom_sites_solution_primary      direct 
_atom_sites_solution_secondary    difmap 
_atom_sites_solution_hydrogens    geom 
_refine_ls_hydrogen_treatment     constr 
_refine_ls_extinction_method      none 
_refine_ls_extinction_coef        ? 
_refine_ls_number_reflns          3655 
_refine_ls_number_parameters      236 
_refine_ls_number_restraints      0 
_refine_ls_R_factor_all           0.0346 
_refine_ls_R_factor_gt            0.0275 
_refine_ls_wR_factor_ref          0.0663 
_refine_ls_wR_factor_gt           0.0633 
_refine_ls_goodness_of_fit_ref    1.015 
_refine_ls_restrained_S_all       1.015 
_refine_ls_shift/su_max           0.000 
_refine_ls_shift/su_mean          0.000 
 
loop_ 
 _atom_site_label 
 _atom_site_type_symbol 
 _atom_site_fract_x 
 _atom_site_fract_y 
 _atom_site_fract_z 
 _atom_site_U_iso_or_equiv 
 _atom_site_adp_type 
 _atom_site_occupancy 
 _atom_site_symmetry_multiplicity 
 _atom_site_calc_flag 
 _atom_site_refinement_flags 
 _atom_site_disorder_assembly 
 _atom_site_disorder_group 
C1 C -0.1538(2) 0.07674(8) 0.24239(14) 0.0137(3) Uani 1 1 d . . . 
C2 C -0.1536(2) 0.02761(8) 0.15481(15) 0.0152(4) Uani 1 1 d . . . 
C3 C -0.3039(2) 0.03452(9) 0.07279(15) 0.0168(4) Uani 1 1 d . . . 
H3 H -0.3351 0.0080 0.0062 0.020 Uiso 1 1 calc R . . 
C4 C -0.3987(2) 0.08883(9) 0.10960(15) 0.0170(4) Uani 1 1 d . . . 
H4 H -0.5048 0.1050 0.0713 0.020 Uiso 1 1 calc R . . 
C5 C -0.3076(2) 0.11463(9) 0.21308(15) 0.0157(4) Uani 1 1 d . . . 
H5 H -0.3426 0.1509 0.2558 0.019 Uiso 1 1 calc R . . 
C6 C -0.3488(2) -0.03144(9) 0.38227(15) 0.0193(4) Uani 1 1 d . . . 
H6 H -0.2651 -0.0237 0.4475 0.023 Uiso 1 1 calc R . . 
C7 C -0.3437(2) -0.08237(9) 0.29948(16) 0.0201(4) Uani 1 1 d . . . 
H7 H -0.2565 -0.1150 0.2994 0.024 Uiso 1 1 calc R . . 
C8 C -0.4929(2) -0.07589(9) 0.21628(16) 0.0203(4) Uani 1 1 d . . . 
H8 H -0.5225 -0.1034 0.1507 0.024 Uiso 1 1 calc R . . 
C9 C -0.5893(2) -0.02132(10) 0.24833(16) 0.0218(4) Uani 1 1 d . . . 
H9 H -0.6949 -0.0058 0.2080 0.026 Uiso 1 1 calc R . . 
C10 C -0.5008(2) 0.00608(10) 0.35100(16) 0.0214(4) Uani 1 1 d . . . 
H10 H -0.5367 0.0431 0.3918 0.026 Uiso 1 1 calc R . . 
C11 C -0.0555(3) -0.07488(10) 0.08577(17) 0.0275(5) Uani 1 1 d . . . 
H11A H -0.1430 -0.1016 0.1120 0.041 Uiso 1 1 calc R . . 
H11B H 0.0465 -0.1028 0.0918 0.041 Uiso 1 1 calc R . . 
H11C H -0.0949 -0.0616 0.0071 0.041 Uiso 1 1 calc R . . 
C12 C 0.1532(2) 0.14700(8) 0.30907(15) 0.0161(4) Uani 1 1 d . . . 
C13 C 0.1345(2) 0.16499(9) 0.19631(16) 0.0215(4) Uani 1 1 d . . . 
H13 H 0.0457 0.1455 0.1430 0.026 Uiso 1 1 calc R . . 
C14 C 0.2440(3) 0.21113(10) 0.16065(19) 0.0289(5) Uani 1 1 d . . . 
H14 H 0.2303 0.2227 0.0832 0.035 Uiso 1 1 calc R . . 
C15 C 0.3729(2) 0.24025(10) 0.2375(2) 0.0307(5) Uani 1 1 d . . . 
H15 H 0.4471 0.2723 0.2133 0.037 Uiso 1 1 calc R . . 
C16 C 0.3934(2) 0.22255(10) 0.3500(2) 0.0305(5) Uani 1 1 d . . . 
H16 H 0.4815 0.2427 0.4031 0.037 Uiso 1 1 calc R . . 
C17 C 0.2866(2) 0.17584(10) 0.38547(17) 0.0238(4) Uani 1 1 d . . . 
H17 H 0.3038 0.1631 0.4626 0.029 Uiso 1 1 calc R . . 
C18 C -0.0801(2) 0.14275(9) 0.45370(14) 0.0165(4) Uani 1 1 d . . . 
C19 C -0.1099(2) 0.21259(9) 0.43078(15) 0.0177(4) Uani 1 1 d . . . 
H19 H -0.0796 0.2324 0.3657 0.021 Uiso 1 1 calc R . . 
C20 C -0.1832(2) 0.25294(9) 0.50237(16) 0.0222(4) Uani 1 1 d . . . 
H20 H -0.2034 0.3003 0.4861 0.027 Uiso 1 1 calc R . . 
C21 C -0.2271(2) 0.22458(10) 0.59754(17) 0.0271(5) Uani 1 1 d . . . 
H21 H -0.2771 0.2525 0.6467 0.033 Uiso 1 1 calc R . . 
C22 C -0.1983(3) 0.15559(10) 0.62101(17) 0.0304(5) Uani 1 1 d . . . 
H22 H -0.2296 0.1360 0.6859 0.037 Uiso 1 1 calc R . . 
C23 C -0.1236(2) 0.11489(9) 0.55008(15) 0.0222(4) Uani 1 1 d . . . 
H23 H -0.1021 0.0677 0.5675 0.027 Uiso 1 1 calc R . . 
O1 O -0.01919(15) -0.01455(6) 0.15348(11) 0.0208(3) Uani 1 1 d . . . 
P1 P 0.01619(5) 0.08527(2) 0.36324(4) 0.01401(11) Uani 1 1 d . . . 
Fe1 Fe -0.35845(3) 0.013354(12) 0.22839(2) 0.01243(8) Uani 1 1 d . . . 
 
loop_ 
 _atom_site_aniso_label 
 _atom_site_aniso_U_11 
 _atom_site_aniso_U_22 
 _atom_site_aniso_U_33 
 _atom_site_aniso_U_23 
 _atom_site_aniso_U_13 
 _atom_site_aniso_U_12 
C1 0.0140(8) 0.0129(8) 0.0146(9) 0.0007(7) 0.0035(7) -0.0025(6) 
C2 0.0150(8) 0.0157(8) 0.0161(9) -0.0003(7) 0.0060(7) -0.0023(7) 
C3 0.0175(9) 0.0207(9) 0.0121(9) 0.0003(7) 0.0022(7) -0.0054(7) 
C4 0.0159(9) 0.0178(9) 0.0166(9) 0.0060(7) 0.0010(7) -0.0015(7) 
C5 0.0156(8) 0.0132(8) 0.0181(9) 0.0025(7) 0.0030(7) -0.0003(7) 
C6 0.0213(9) 0.0214(9) 0.0145(9) 0.0046(8) 0.0016(7) -0.0042(7) 
C7 0.0216(10) 0.0147(8) 0.0244(10) 0.0071(8) 0.0053(8) -0.0001(7) 
C8 0.0232(10) 0.0189(9) 0.0186(10) 0.0001(8) 0.0036(8) -0.0111(7) 
C9 0.0132(9) 0.0286(10) 0.0237(10) 0.0090(8) 0.0042(8) -0.0050(8) 
C10 0.0238(10) 0.0232(9) 0.0209(10) 0.0019(8) 0.0135(8) -0.0006(8) 
C11 0.0284(11) 0.0251(10) 0.0305(11) -0.0122(9) 0.0093(9) 0.0016(8) 
C12 0.0118(8) 0.0125(8) 0.0242(10) -0.0021(7) 0.0037(7) 0.0023(7) 
C13 0.0191(9) 0.0199(9) 0.0259(10) -0.0009(8) 0.0052(8) -0.0014(7) 
C14 0.0293(11) 0.0235(10) 0.0372(12) 0.0062(9) 0.0150(9) 0.0012(8) 
C15 0.0191(10) 0.0151(9) 0.0625(16) 0.0019(10) 0.0198(10) 0.0009(8) 
C16 0.0159(10) 0.0226(10) 0.0520(14) -0.0084(10) 0.0043(9) -0.0026(8) 
C17 0.0174(9) 0.0236(10) 0.0288(11) -0.0044(9) 0.0005(8) 0.0000(8) 
C18 0.0161(9) 0.0179(9) 0.0146(9) -0.0037(7) 0.0009(7) -0.0035(7) 
C19 0.0164(9) 0.0186(9) 0.0177(9) -0.0017(7) 0.0025(7) -0.0017(7) 
C20 0.0191(9) 0.0175(9) 0.0294(11) -0.0064(8) 0.0033(8) -0.0024(7) 
C21 0.0282(11) 0.0267(10) 0.0296(11) -0.0125(9) 0.0135(9) -0.0063(9) 
C22 0.0438(13) 0.0271(11) 0.0251(11) -0.0051(9) 0.0182(10) -0.0107(9) 
C23 0.0315(11) 0.0166(9) 0.0192(10) -0.0009(8) 0.0061(8) -0.0050(8) 
O1 0.0152(6) 0.0236(7) 0.0241(7) -0.0104(6) 0.0050(5) 0.0017(5) 
P1 0.0144(2) 0.0132(2) 0.0138(2) -0.00115(18) 0.00076(18) -0.00002(17) 
Fe1 0.01178(13) 0.01285(13) 0.01263(14) 0.00069(10) 0.00226(10) -0.00089(9) 
 
_geom_special_details 
; 
 All esds (except the esd in the dihedral angle between two l.s. planes) 
 are estimated using the full covariance matrix.  The cell esds are taken 
 into account individually in the estimation of esds in distances, angles 
 and torsion angles; correlations between esds in cell parameters are only 
 used when they are defined by crystal symmetry.  An approximate (isotropic) 
 treatment of cell esds is used for estimating esds involving l.s. planes. 
; 
 
loop_ 
 _geom_bond_atom_site_label_1 
 _geom_bond_atom_site_label_2 
 _geom_bond_distance 
 _geom_bond_site_symmetry_2 
 _geom_bond_publ_flag 
C1 C2 1.427(2) . ? 
C1 C5 1.433(2) . ? 
C1 P1 1.8160(17) . ? 
C1 Fe1 2.0478(16) . ? 
C2 O1 1.366(2) . ? 
C2 C3 1.424(2) . ? 
C2 Fe1 2.0463(17) . ? 
C3 C4 1.427(2) . ? 
C3 Fe1 2.0562(17) . ? 
C3 H3 0.9500 . ? 
C4 C5 1.419(2) . ? 
C4 Fe1 2.0375(17) . ? 
C4 H4 0.9500 . ? 
C5 Fe1 2.0287(17) . ? 
C5 H5 0.9500 . ? 
C6 C7 1.415(3) . ? 
C6 C10 1.419(3) . ? 
C6 Fe1 2.0441(18) . ? 
C6 H6 0.9500 . ? 
C7 C8 1.424(3) . ? 
C7 Fe1 2.0454(17) . ? 
C7 H7 0.9500 . ? 
C8 C9 1.416(3) . ? 
C8 Fe1 2.0400(17) . ? 
C8 H8 0.9500 . ? 
C9 C10 1.416(3) . ? 
C9 Fe1 2.0458(18) . ? 
C9 H9 0.9500 . ? 
C10 Fe1 2.0501(18) . ? 
C10 H10 0.9500 . ? 
C11 O1 1.430(2) . ? 
C11 H11A 0.9800 . ? 
C11 H11B 0.9800 . ? 
C11 H11C 0.9800 . ? 
C12 C13 1.389(3) . ? 
C12 C17 1.400(2) . ? 
C12 P1 1.8388(18) . ? 
C13 C14 1.387(3) . ? 
C13 H13 0.9500 . ? 
C14 C15 1.381(3) . ? 
C14 H14 0.9500 . ? 
C15 C16 1.384(3) . ? 
C15 H15 0.9500 . ? 
C16 C17 1.378(3) . ? 
C16 H16 0.9500 . ? 
C17 H17 0.9500 . ? 
C18 C23 1.391(3) . ? 
C18 C19 1.398(2) . ? 
C18 P1 1.8395(18) . ? 
C19 C20 1.384(2) . ? 
C19 H19 0.9500 . ? 
C20 C21 1.383(3) . ? 
C20 H20 0.9500 . ? 
C21 C22 1.383(3) . ? 
C21 H21 0.9500 . ? 
C22 C23 1.388(3) . ? 
C22 H22 0.9500 . ? 
C23 H23 0.9500 . ? 
 
loop_ 
 _geom_angle_atom_site_label_1 
 _geom_angle_atom_site_label_2 
 _geom_angle_atom_site_label_3 
 _geom_angle 
 _geom_angle_site_symmetry_1 
 _geom_angle_site_symmetry_3 
 _geom_angle_publ_flag 
C2 C1 C5 106.50(15) . . ? 
C2 C1 P1 123.47(13) . . ? 
C5 C1 P1 130.02(13) . . ? 
C2 C1 Fe1 69.54(9) . . ? 
C5 C1 Fe1 68.70(9) . . ? 
P1 C1 Fe1 126.87(9) . . ? 
O1 C2 C3 128.81(15) . . ? 
O1 C2 C1 121.61(15) . . ? 
C3 C2 C1 109.46(15) . . ? 
O1 C2 Fe1 129.66(12) . . ? 
C3 C2 Fe1 70.07(10) . . ? 
C1 C2 Fe1 69.65(10) . . ? 
C2 C3 C4 106.99(15) . . ? 
C2 C3 Fe1 69.32(10) . . ? 
C4 C3 Fe1 68.91(10) . . ? 
C2 C3 H3 126.5 . . ? 
C4 C3 H3 126.5 . . ? 
Fe1 C3 H3 126.8 . . ? 
C5 C4 C3 108.47(15) . . ? 
C5 C4 Fe1 69.24(9) . . ? 
C3 C4 Fe1 70.31(10) . . ? 
C5 C4 H4 125.8 . . ? 
C3 C4 H4 125.8 . . ? 
Fe1 C4 H4 126.3 . . ? 
C4 C5 C1 108.58(15) . . ? 
C4 C5 Fe1 69.91(10) . . ? 
C1 C5 Fe1 70.13(9) . . ? 
C4 C5 H5 125.7 . . ? 
C1 C5 H5 125.7 . . ? 
Fe1 C5 H5 125.8 . . ? 
C7 C6 C10 108.18(16) . . ? 
C7 C6 Fe1 69.80(10) . . ? 
C10 C6 Fe1 69.94(10) . . ? 
C7 C6 H6 125.9 . . ? 
C10 C6 H6 125.9 . . ? 
Fe1 C6 H6 125.9 . . ? 
C6 C7 C8 107.66(16) . . ? 
C6 C7 Fe1 69.70(10) . . ? 
C8 C7 Fe1 69.39(10) . . ? 
C6 C7 H7 126.2 . . ? 
C8 C7 H7 126.2 . . ? 
Fe1 C7 H7 126.3 . . ? 
C9 C8 C7 108.14(16) . . ? 
C9 C8 Fe1 69.95(10) . . ? 
C7 C8 Fe1 69.80(10) . . ? 
C9 C8 H8 125.9 . . ? 
C7 C8 H8 125.9 . . ? 
Fe1 C8 H8 125.9 . . ? 
C8 C9 C10 107.99(17) . . ? 
C8 C9 Fe1 69.51(10) . . ? 
C10 C9 Fe1 69.94(10) . . ? 
C8 C9 H9 126.0 . . ? 
C10 C9 H9 126.0 . . ? 
Fe1 C9 H9 126.1 . . ? 
C9 C10 C6 108.03(17) . . ? 
C9 C10 Fe1 69.62(10) . . ? 
C6 C10 Fe1 69.49(10) . . ? 
C9 C10 H10 126.0 . . ? 
C6 C10 H10 126.0 . . ? 
Fe1 C10 H10 126.5 . . ? 
O1 C11 H11A 109.5 . . ? 
O1 C11 H11B 109.5 . . ? 
H11A C11 H11B 109.5 . . ? 
O1 C11 H11C 109.5 . . ? 
H11A C11 H11C 109.5 . . ? 
H11B C11 H11C 109.5 . . ? 
C13 C12 C17 118.30(17) . . ? 
C13 C12 P1 123.68(13) . . ? 
C17 C12 P1 117.99(14) . . ? 
C14 C13 C12 120.81(18) . . ? 
C14 C13 H13 119.6 . . ? 
C12 C13 H13 119.6 . . ? 
C15 C14 C13 120.1(2) . . ? 
C15 C14 H14 119.9 . . ? 
C13 C14 H14 119.9 . . ? 
C14 C15 C16 119.65(18) . . ? 
C14 C15 H15 120.2 . . ? 
C16 C15 H15 120.2 . . ? 
C17 C16 C15 120.36(19) . . ? 
C17 C16 H16 119.8 . . ? 
C15 C16 H16 119.8 . . ? 
C16 C17 C12 120.70(19) . . ? 
C16 C17 H17 119.6 . . ? 
C12 C17 H17 119.6 . . ? 
C23 C18 C19 118.91(17) . . ? 
C23 C18 P1 117.77(13) . . ? 
C19 C18 P1 123.31(14) . . ? 
C20 C19 C18 120.34(17) . . ? 
C20 C19 H19 119.8 . . ? 
C18 C19 H19 119.8 . . ? 
C19 C20 C21 120.28(17) . . ? 
C19 C20 H20 119.9 . . ? 
C21 C20 H20 119.9 . . ? 
C22 C21 C20 119.85(18) . . ? 
C22 C21 H21 120.1 . . ? 
C20 C21 H21 120.1 . . ? 
C21 C22 C23 120.23(19) . . ? 
C21 C22 H22 119.9 . . ? 
C23 C22 H22 119.9 . . ? 
C22 C23 C18 120.38(18) . . ? 
C22 C23 H23 119.8 . . ? 
C18 C23 H23 119.8 . . ? 
C2 O1 C11 114.96(14) . . ? 
C1 P1 C12 100.92(8) . . ? 
C1 P1 C18 101.08(8) . . ? 
C12 P1 C18 99.69(8) . . ? 
C5 Fe1 C4 40.85(7) . . ? 
C5 Fe1 C8 159.24(7) . . ? 
C4 Fe1 C8 123.44(7) . . ? 
C5 Fe1 C6 121.61(7) . . ? 
C4 Fe1 C6 157.43(7) . . ? 
C8 Fe1 C6 68.28(7) . . ? 
C5 Fe1 C7 157.83(7) . . ? 
C4 Fe1 C7 160.35(7) . . ? 
C8 Fe1 C7 40.80(7) . . ? 
C6 Fe1 C7 40.50(7) . . ? 
C5 Fe1 C9 122.50(7) . . ? 
C4 Fe1 C9 107.08(7) . . ? 
C8 Fe1 C9 40.54(8) . . ? 
C6 Fe1 C9 68.24(7) . . ? 
C7 Fe1 C9 68.39(7) . . ? 
C5 Fe1 C2 68.46(7) . . ? 
C4 Fe1 C2 68.25(7) . . ? 
C8 Fe1 C2 123.39(7) . . ? 
C6 Fe1 C2 124.10(7) . . ? 
C7 Fe1 C2 108.61(7) . . ? 
C9 Fe1 C2 158.71(7) . . ? 
C5 Fe1 C1 41.16(7) . . ? 
C4 Fe1 C1 69.07(7) . . ? 
C8 Fe1 C1 158.67(7) . . ? 
C6 Fe1 C1 106.94(7) . . ? 
C7 Fe1 C1 122.13(7) . . ? 
C9 Fe1 C1 158.95(7) . . ? 
C2 Fe1 C1 40.81(7) . . ? 
C5 Fe1 C10 106.57(7) . . ? 
C4 Fe1 C10 121.60(7) . . ? 
C8 Fe1 C10 68.10(8) . . ? 
C6 Fe1 C10 40.57(7) . . ? 
C7 Fe1 C10 68.20(7) . . ? 
C9 Fe1 C10 40.44(8) . . ? 
C2 Fe1 C10 159.86(8) . . ? 
C1 Fe1 C10 122.68(7) . . ? 
C5 Fe1 C3 68.84(7) . . ? 
C4 Fe1 C3 40.78(7) . . ? 
C8 Fe1 C3 108.03(7) . . ? 
C6 Fe1 C3 160.42(7) . . ? 
C7 Fe1 C3 124.20(7) . . ? 
C9 Fe1 C3 122.33(7) . . ? 
C2 Fe1 C3 40.61(7) . . ? 
C1 Fe1 C3 69.11(7) . . ? 
C10 Fe1 C3 157.71(8) . . ? 
 
loop_ 
 _geom_torsion_atom_site_label_1 
 _geom_torsion_atom_site_label_2 
 _geom_torsion_atom_site_label_3 
 _geom_torsion_atom_site_label_4 
 _geom_torsion 
 _geom_torsion_site_symmetry_1 
 _geom_torsion_site_symmetry_2 
 _geom_torsion_site_symmetry_3 
 _geom_torsion_site_symmetry_4 
 _geom_torsion_publ_flag 
C5 C1 C2 O1 176.16(15) . . . . ? 
P1 C1 C2 O1 -3.4(2) . . . . ? 
Fe1 C1 C2 O1 -124.83(16) . . . . ? 
C5 C1 C2 C3 -0.12(19) . . . . ? 
P1 C1 C2 C3 -179.70(12) . . . . ? 
Fe1 C1 C2 C3 58.89(12) . . . . ? 
C5 C1 C2 Fe1 -59.01(11) . . . . ? 
P1 C1 C2 Fe1 121.40(13) . . . . ? 
O1 C2 C3 C4 -175.74(16) . . . . ? 
C1 C2 C3 C4 0.19(19) . . . . ? 
Fe1 C2 C3 C4 58.83(11) . . . . ? 
O1 C2 C3 Fe1 125.43(18) . . . . ? 
C1 C2 C3 Fe1 -58.64(12) . . . . ? 
C2 C3 C4 C5 -0.19(19) . . . . ? 
Fe1 C3 C4 C5 58.91(12) . . . . ? 
C2 C3 C4 Fe1 -59.10(11) . . . . ? 
C3 C4 C5 C1 0.12(19) . . . . ? 
Fe1 C4 C5 C1 59.69(11) . . . . ? 
C3 C4 C5 Fe1 -59.57(12) . . . . ? 
C2 C1 C5 C4 0.00(18) . . . . ? 
P1 C1 C5 C4 179.55(13) . . . . ? 
Fe1 C1 C5 C4 -59.55(12) . . . . ? 
C2 C1 C5 Fe1 59.55(11) . . . . ? 
P1 C1 C5 Fe1 -120.90(15) . . . . ? 
C10 C6 C7 C8 0.4(2) . . . . ? 
Fe1 C6 C7 C8 -59.24(12) . . . . ? 
C10 C6 C7 Fe1 59.64(12) . . . . ? 
C6 C7 C8 C9 -0.24(19) . . . . ? 
Fe1 C7 C8 C9 -59.67(12) . . . . ? 
C6 C7 C8 Fe1 59.43(12) . . . . ? 
C7 C8 C9 C10 0.0(2) . . . . ? 
Fe1 C8 C9 C10 -59.59(12) . . . . ? 
C7 C8 C9 Fe1 59.58(12) . . . . ? 
C8 C9 C10 C6 0.3(2) . . . . ? 
Fe1 C9 C10 C6 -59.06(12) . . . . ? 
C8 C9 C10 Fe1 59.32(12) . . . . ? 
C7 C6 C10 C9 -0.4(2) . . . . ? 
Fe1 C6 C10 C9 59.14(12) . . . . ? 
C7 C6 C10 Fe1 -59.55(12) . . . . ? 
C17 C12 C13 C14 -0.9(3) . . . . ? 
P1 C12 C13 C14 -178.95(14) . . . . ? 
C12 C13 C14 C15 -0.5(3) . . . . ? 
C13 C14 C15 C16 0.7(3) . . . . ? 
C14 C15 C16 C17 0.4(3) . . . . ? 
C15 C16 C17 C12 -1.8(3) . . . . ? 
C13 C12 C17 C16 2.0(3) . . . . ? 
P1 C12 C17 C16 -179.81(14) . . . . ? 
C23 C18 C19 C20 -0.8(3) . . . . ? 
P1 C18 C19 C20 179.88(14) . . . . ? 
C18 C19 C20 C21 0.2(3) . . . . ? 
C19 C20 C21 C22 -0.2(3) . . . . ? 
C20 C21 C22 C23 0.7(3) . . . . ? 
C21 C22 C23 C18 -1.2(3) . . . . ? 
C19 C18 C23 C22 1.2(3) . . . . ? 
P1 C18 C23 C22 -179.36(15) . . . . ? 
C3 C2 O1 C11 -24.6(2) . . . . ? 
C1 C2 O1 C11 159.88(16) . . . . ? 
Fe1 C2 O1 C11 71.0(2) . . . . ? 
C2 C1 P1 C12 88.76(15) . . . . ? 
C5 C1 P1 C12 -90.73(17) . . . . ? 
Fe1 C1 P1 C12 177.16(10) . . . . ? 
C2 C1 P1 C18 -168.97(14) . . . . ? 
C5 C1 P1 C18 11.54(17) . . . . ? 
Fe1 C1 P1 C18 -80.57(12) . . . . ? 
C13 C12 P1 C1 -12.56(16) . . . . ? 
C17 C12 P1 C1 169.39(14) . . . . ? 
C13 C12 P1 C18 -115.94(15) . . . . ? 
C17 C12 P1 C18 66.01(15) . . . . ? 
C23 C18 P1 C1 108.53(15) . . . . ? 
C19 C18 P1 C1 -72.10(16) . . . . ? 
C23 C18 P1 C12 -148.21(14) . . . . ? 
C19 C18 P1 C12 31.16(16) . . . . ? 
C1 C5 Fe1 C4 -119.53(15) . . . . ? 
C4 C5 Fe1 C8 -47.7(2) . . . . ? 
C1 C5 Fe1 C8 -167.19(19) . . . . ? 
C4 C5 Fe1 C6 -161.08(10) . . . . ? 
C1 C5 Fe1 C6 79.39(12) . . . . ? 
C4 C5 Fe1 C7 167.80(17) . . . . ? 
C1 C5 Fe1 C7 48.3(2) . . . . ? 
C4 C5 Fe1 C9 -78.21(12) . . . . ? 
C1 C5 Fe1 C9 162.27(10) . . . . ? 
C4 C5 Fe1 C2 81.22(11) . . . . ? 
C1 C5 Fe1 C2 -38.31(10) . . . . ? 
C4 C5 Fe1 C1 119.53(15) . . . . ? 
C4 C5 Fe1 C10 -119.45(11) . . . . ? 
C1 C5 Fe1 C10 121.02(11) . . . . ? 
C4 C5 Fe1 C3 37.48(10) . . . . ? 
C1 C5 Fe1 C3 -82.05(11) . . . . ? 
C3 C4 Fe1 C5 119.70(14) . . . . ? 
C5 C4 Fe1 C8 161.70(10) . . . . ? 
C3 C4 Fe1 C8 -78.60(12) . . . . ? 
C5 C4 Fe1 C6 46.0(2) . . . . ? 
C3 C4 Fe1 C6 165.71(17) . . . . ? 
C5 C4 Fe1 C7 -166.29(19) . . . . ? 
C3 C4 Fe1 C7 -46.6(2) . . . . ? 
C5 C4 Fe1 C9 120.27(11) . . . . ? 
C3 C4 Fe1 C9 -120.02(11) . . . . ? 
C5 C4 Fe1 C2 -81.78(11) . . . . ? 
C3 C4 Fe1 C2 37.93(10) . . . . ? 
C5 C4 Fe1 C1 -37.82(10) . . . . ? 
C3 C4 Fe1 C1 81.88(10) . . . . ? 
C5 C4 Fe1 C10 78.50(12) . . . . ? 
C3 C4 Fe1 C10 -161.80(10) . . . . ? 
C5 C4 Fe1 C3 -119.70(14) . . . . ? 
C9 C8 Fe1 C5 -41.3(3) . . . . ? 
C7 C8 Fe1 C5 -160.43(18) . . . . ? 
C9 C8 Fe1 C4 -76.66(13) . . . . ? 
C7 C8 Fe1 C4 164.16(11) . . . . ? 
C9 C8 Fe1 C6 81.47(12) . . . . ? 
C7 C8 Fe1 C6 -37.70(11) . . . . ? 
C9 C8 Fe1 C7 119.17(16) . . . . ? 
C7 C8 Fe1 C9 -119.17(16) . . . . ? 
C9 C8 Fe1 C2 -161.12(11) . . . . ? 
C7 C8 Fe1 C2 79.71(13) . . . . ? 
C9 C8 Fe1 C1 162.40(18) . . . . ? 
C7 C8 Fe1 C1 43.2(2) . . . . ? 
C9 C8 Fe1 C10 37.62(11) . . . . ? 
C7 C8 Fe1 C10 -81.55(12) . . . . ? 
C9 C8 Fe1 C3 -118.99(11) . . . . ? 
C7 C8 Fe1 C3 121.83(11) . . . . ? 
C7 C6 Fe1 C5 -162.53(10) . . . . ? 
C10 C6 Fe1 C5 78.25(12) . . . . ? 
C7 C6 Fe1 C4 163.93(17) . . . . ? 
C10 C6 Fe1 C4 44.7(2) . . . . ? 
C7 C6 Fe1 C8 37.97(11) . . . . ? 
C10 C6 Fe1 C8 -81.26(12) . . . . ? 
C10 C6 Fe1 C7 -119.23(16) . . . . ? 
C7 C6 Fe1 C9 81.77(12) . . . . ? 
C10 C6 Fe1 C9 -37.46(11) . . . . ? 
C7 C6 Fe1 C2 -78.50(12) . . . . ? 
C10 C6 Fe1 C2 162.27(11) . . . . ? 
C7 C6 Fe1 C1 -119.97(11) . . . . ? 
C10 C6 Fe1 C1 120.80(11) . . . . ? 
C7 C6 Fe1 C10 119.23(16) . . . . ? 
C7 C6 Fe1 C3 -44.8(3) . . . . ? 
C10 C6 Fe1 C3 -164.04(19) . . . . ? 
C6 C7 Fe1 C5 42.7(2) . . . . ? 
C8 C7 Fe1 C5 161.65(17) . . . . ? 
C6 C7 Fe1 C4 -161.59(19) . . . . ? 
C8 C7 Fe1 C4 -42.6(3) . . . . ? 
C6 C7 Fe1 C8 -118.98(16) . . . . ? 
C8 C7 Fe1 C6 118.98(16) . . . . ? 
C6 C7 Fe1 C9 -81.36(12) . . . . ? 
C8 C7 Fe1 C9 37.62(11) . . . . ? 
C6 C7 Fe1 C2 121.11(11) . . . . ? 
C8 C7 Fe1 C2 -119.91(11) . . . . ? 
C6 C7 Fe1 C1 78.13(12) . . . . ? 
C8 C7 Fe1 C1 -162.89(10) . . . . ? 
C6 C7 Fe1 C10 -37.68(11) . . . . ? 
C8 C7 Fe1 C10 81.30(12) . . . . ? 
C6 C7 Fe1 C3 163.40(11) . . . . ? 
C8 C7 Fe1 C3 -77.61(13) . . . . ? 
C8 C9 Fe1 C5 163.91(10) . . . . ? 
C10 C9 Fe1 C5 -76.93(13) . . . . ? 
C8 C9 Fe1 C4 121.85(11) . . . . ? 
C10 C9 Fe1 C4 -118.98(11) . . . . ? 
C10 C9 Fe1 C8 119.16(16) . . . . ? 
C8 C9 Fe1 C6 -81.59(12) . . . . ? 
C10 C9 Fe1 C6 37.57(11) . . . . ? 
C8 C9 Fe1 C7 -37.86(11) . . . . ? 
C10 C9 Fe1 C7 81.31(12) . . . . ? 
C8 C9 Fe1 C2 48.1(2) . . . . ? 
C10 C9 Fe1 C2 167.24(17) . . . . ? 
C8 C9 Fe1 C1 -162.16(18) . . . . ? 
C10 C9 Fe1 C1 -43.0(2) . . . . ? 
C8 C9 Fe1 C10 -119.16(16) . . . . ? 
C8 C9 Fe1 C3 79.84(13) . . . . ? 
C10 C9 Fe1 C3 -161.00(11) . . . . ? 
O1 C2 Fe1 C5 153.37(17) . . . . ? 
C3 C2 Fe1 C5 -82.19(11) . . . . ? 
C1 C2 Fe1 C5 38.63(10) . . . . ? 
O1 C2 Fe1 C4 -162.52(17) . . . . ? 
C3 C2 Fe1 C4 -38.09(10) . . . . ? 
C1 C2 Fe1 C4 82.74(11) . . . . ? 
O1 C2 Fe1 C8 -45.93(18) . . . . ? 
C3 C2 Fe1 C8 78.51(12) . . . . ? 
C1 C2 Fe1 C8 -160.67(10) . . . . ? 
O1 C2 Fe1 C6 38.97(18) . . . . ? 
C3 C2 Fe1 C6 163.41(10) . . . . ? 
C1 C2 Fe1 C6 -75.77(12) . . . . ? 
O1 C2 Fe1 C7 -3.21(17) . . . . ? 
C3 C2 Fe1 C7 121.22(11) . . . . ? 
C1 C2 Fe1 C7 -117.95(10) . . . . ? 
O1 C2 Fe1 C9 -81.3(3) . . . . ? 
C3 C2 Fe1 C9 43.1(2) . . . . ? 
C1 C2 Fe1 C9 163.94(18) . . . . ? 
O1 C2 Fe1 C1 114.74(19) . . . . ? 
C3 C2 Fe1 C1 -120.82(14) . . . . ? 
O1 C2 Fe1 C10 74.1(3) . . . . ? 
C3 C2 Fe1 C10 -161.48(19) . . . . ? 
C1 C2 Fe1 C10 -40.7(2) . . . . ? 
O1 C2 Fe1 C3 -124.4(2) . . . . ? 
C1 C2 Fe1 C3 120.82(14) . . . . ? 
C2 C1 Fe1 C5 -118.09(14) . . . . ? 
P1 C1 Fe1 C5 124.78(16) . . . . ? 
C2 C1 Fe1 C4 -80.55(11) . . . . ? 
C5 C1 Fe1 C4 37.54(10) . . . . ? 
P1 C1 Fe1 C4 162.32(13) . . . . ? 
C2 C1 Fe1 C8 49.4(2) . . . . ? 
C5 C1 Fe1 C8 167.52(18) . . . . ? 
P1 C1 Fe1 C8 -67.7(2) . . . . ? 
C2 C1 Fe1 C6 122.96(10) . . . . ? 
C5 C1 Fe1 C6 -118.94(11) . . . . ? 
P1 C1 Fe1 C6 5.83(13) . . . . ? 
C2 C1 Fe1 C7 81.33(12) . . . . ? 
C5 C1 Fe1 C7 -160.58(10) . . . . ? 
P1 C1 Fe1 C7 -35.80(14) . . . . ? 
C2 C1 Fe1 C9 -163.75(18) . . . . ? 
C5 C1 Fe1 C9 -45.7(2) . . . . ? 
P1 C1 Fe1 C9 79.1(2) . . . . ? 
C5 C1 Fe1 C2 118.09(14) . . . . ? 
P1 C1 Fe1 C2 -117.13(16) . . . . ? 
C2 C1 Fe1 C10 164.54(10) . . . . ? 
C5 C1 Fe1 C10 -77.36(12) . . . . ? 
P1 C1 Fe1 C10 47.41(14) . . . . ? 
C2 C1 Fe1 C3 -36.75(10) . . . . ? 
C5 C1 Fe1 C3 81.35(11) . . . . ? 
P1 C1 Fe1 C3 -153.88(13) . . . . ? 
C9 C10 Fe1 C5 121.01(11) . . . . ? 
C6 C10 Fe1 C5 -119.54(11) . . . . ? 
C9 C10 Fe1 C4 79.04(13) . . . . ? 
C6 C10 Fe1 C4 -161.52(10) . . . . ? 
C9 C10 Fe1 C8 -37.71(11) . . . . ? 
C6 C10 Fe1 C8 81.74(12) . . . . ? 
C9 C10 Fe1 C6 -119.45(16) . . . . ? 
C9 C10 Fe1 C7 -81.83(12) . . . . ? 
C6 C10 Fe1 C7 37.62(11) . . . . ? 
C6 C10 Fe1 C9 119.45(16) . . . . ? 
C9 C10 Fe1 C2 -166.52(18) . . . . ? 
C6 C10 Fe1 C2 -47.1(2) . . . . ? 
C9 C10 Fe1 C1 163.08(10) . . . . ? 
C6 C10 Fe1 C1 -77.47(12) . . . . ? 
C9 C10 Fe1 C3 46.5(2) . . . . ? 
C6 C10 Fe1 C3 165.94(17) . . . . ? 
C2 C3 Fe1 C5 81.17(10) . . . . ? 
C4 C3 Fe1 C5 -37.53(10) . . . . ? 
C2 C3 Fe1 C4 118.71(14) . . . . ? 
C2 C3 Fe1 C8 -120.63(10) . . . . ? 
C4 C3 Fe1 C8 120.66(11) . . . . ? 
C2 C3 Fe1 C6 -44.9(2) . . . . ? 
C4 C3 Fe1 C6 -163.58(19) . . . . ? 
C2 C3 Fe1 C7 -78.47(12) . . . . ? 
C4 C3 Fe1 C7 162.82(10) . . . . ? 
C2 C3 Fe1 C9 -162.92(10) . . . . ? 
C4 C3 Fe1 C9 78.37(12) . . . . ? 
C4 C3 Fe1 C2 -118.71(14) . . . . ? 
C2 C3 Fe1 C1 36.92(10) . . . . ? 
C4 C3 Fe1 C1 -81.78(11) . . . . ? 
C2 C3 Fe1 C10 163.25(17) . . . . ? 
C4 C3 Fe1 C10 44.5(2) . . . . ? 
 
_diffrn_measured_fraction_theta_max    0.996 
_diffrn_reflns_theta_full              25.99 
_diffrn_measured_fraction_theta_full   0.996 
_refine_diff_density_max    0.358 
_refine_diff_density_min   -0.233 
_refine_diff_density_rms    0.053 

#===END

#=====================================================================
# cif data for "exp_086" (compound 10)
#===================================================================== 
 
data_exp_086
 
_audit_creation_method            SHELXL-97
_chemical_name_systematic
;
 ?
;
_chemical_name_common             ?
_chemical_melting_point           ?
_chemical_formula_moiety          
 'C22 H19 Fe O P S' 
_chemical_formula_sum
 'C22 H19 Fe O P S'
_chemical_formula_weight          418.25
 
loop_
 _atom_type_symbol
 _atom_type_description
 _atom_type_scat_dispersion_real
 _atom_type_scat_dispersion_imag
 _atom_type_scat_source
 'C'  'C'   0.0033   0.0016
 'International Tables Vol C Tables 4.2.6.8 and 6.1.1.4'
 'H'  'H'   0.0000   0.0000
 'International Tables Vol C Tables 4.2.6.8 and 6.1.1.4'
 'O'  'O'   0.0106   0.0060
 'International Tables Vol C Tables 4.2.6.8 and 6.1.1.4'
 'P'  'P'   0.1023   0.0942
 'International Tables Vol C Tables 4.2.6.8 and 6.1.1.4'
 'S'  'S'   0.1246   0.1234
 'International Tables Vol C Tables 4.2.6.8 and 6.1.1.4'
 'Fe'  'Fe'   0.3463   0.8444
 'International Tables Vol C Tables 4.2.6.8 and 6.1.1.4'
 
_symmetry_cell_setting            'monoclinic'
_symmetry_space_group_name_H-M    'P1 21/c 1'
_symmetry_space_group_name_Hall   '-P 2ybc'
 
loop_
 _symmetry_equiv_pos_as_xyz
 'x, y, z'
 '-x, y+1/2, -z+1/2'
 '-x, -y, -z'
 'x, -y-1/2, z-1/2'
 
_cell_length_a                    10.6166(6)
_cell_length_b                    30.5540(17)
_cell_length_c                    11.5573(7)
_cell_angle_alpha                 90.00
_cell_angle_beta                  97.308(6)
_cell_angle_gamma                 90.00
_cell_volume                      3718.5(4)
_cell_formula_units_Z             8
_cell_measurement_temperature     110
_cell_measurement_reflns_used     6574
_cell_measurement_theta_min       2.8591
_cell_measurement_theta_max       28.3961
 
_exptl_crystal_description        'block'
_exptl_crystal_colour             'yellow'
_exptl_crystal_size_max           0.18
_exptl_crystal_size_mid           0.12
_exptl_crystal_size_min           0.12
_exptl_crystal_density_meas       ?
_exptl_crystal_density_diffrn     1.494
_exptl_crystal_density_method     'not measured'
_exptl_crystal_F_000              1728
_exptl_absorpt_coefficient_mu     1.017
_exptl_absorpt_correction_type    'multi-scan'
_exptl_absorpt_correction_T_min   0.80267
_exptl_absorpt_correction_T_max   1.00000
_exptl_absorpt_process_details    
;
CrysAlisPro, Oxford Diffraction Ltd.,
Version 1.171.33.46 (release 27-08-2009 CrysAlis171 .NET)
(compiled Aug 27 2009,17:19:36)
Empirical absorption correction using spherical harmonics,
 implemented in SCALE3 ABSPACK scaling algorithm.
;
 
_exptl_special_details
;
 ?
;
 
_diffrn_ambient_temperature       110
_diffrn_radiation_wavelength      0.71073
_diffrn_radiation_type            MoK\a
_diffrn_radiation_source          'fine-focus sealed tube'
_diffrn_radiation_monochromator   graphite
_diffrn_measurement_device_type   'Oxford Gemini S'
_diffrn_measurement_method        '\w scans'
_diffrn_detector_area_resol_mean  ?
_diffrn_standards_number          2
_diffrn_standards_interval_count  50
_diffrn_standards_interval_time   10
_diffrn_standards_decay_%         0
_diffrn_reflns_number             17774
_diffrn_reflns_av_R_equivalents   0.0389
_diffrn_reflns_av_sigmaI/netI     0.0694
_diffrn_reflns_limit_h_min        -13
_diffrn_reflns_limit_h_max        13
_diffrn_reflns_limit_k_min        -31
_diffrn_reflns_limit_k_max        37
_diffrn_reflns_limit_l_min        -14
_diffrn_reflns_limit_l_max        14
_diffrn_reflns_theta_min          2.87
_diffrn_reflns_theta_max          26.00
_reflns_number_total              7148
_reflns_number_gt                 4879
_reflns_threshold_expression      >2sigma(I)
 
_computing_data_collection
;
CrysAlisPro, Oxford Diffraction Ltd.,
Version 1.171.33.46 (release 27-08-2009 CrysAlis171 .NET)
(compiled Aug 27 2009,17:19:36)
;
_computing_cell_refinement
;
CrysAlisPro, Oxford Diffraction Ltd.,
Version 1.171.33.46 (release 27-08-2009 CrysAlis171 .NET)
(compiled Aug 27 2009,17:19:36)
;
_computing_data_reduction
;
CrysAlisPro, Oxford Diffraction Ltd.,
Version 1.171.33.46 (release 27-08-2009 CrysAlis171 .NET)
(compiled Aug 27 2009,17:19:36)
;
_computing_structure_solution     'SHELXS-97 (Sheldrick, 1997)'
_computing_structure_refinement   'SHELXL-97 (Sheldrick, 1997)'
_computing_molecular_graphics     ?
_computing_publication_material   ?
 
_refine_special_details
;
 Refinement of F^2^ against ALL reflections.  The weighted R-factor wR and
 goodness of fit S are based on F^2^, conventional R-factors R are based
 on F, with F set to zero for negative F^2^. The threshold expression of
 F^2^ > 2sigma(F^2^) is used only for calculating R-factors(gt) etc. and is
 not relevant to the choice of reflections for refinement.  R-factors based
 on F^2^ are statistically about twice as large as those based on F, and R-
 factors based on ALL data will be even larger.
;
 
_refine_ls_structure_factor_coef  Fsqd
_refine_ls_matrix_type            full
_refine_ls_weighting_scheme       calc
_refine_ls_weighting_details
 'calc w=1/[\s^2^(Fo^2^)+(0.0605P)^2^+0.0000P] where P=(Fo^2^+2Fc^2^)/3'
_atom_sites_solution_primary      direct
_atom_sites_solution_secondary    difmap
_atom_sites_solution_hydrogens    geom
_refine_ls_hydrogen_treatment     constr
_refine_ls_extinction_method      none
_refine_ls_extinction_coef        ?
_refine_ls_number_reflns          7148
_refine_ls_number_parameters      469
_refine_ls_number_restraints      0
_refine_ls_R_factor_all           0.0685
_refine_ls_R_factor_gt            0.0436
_refine_ls_wR_factor_ref          0.1077
_refine_ls_wR_factor_gt           0.1031
_refine_ls_goodness_of_fit_ref    0.951
_refine_ls_restrained_S_all       0.951
_refine_ls_shift/su_max           0.001
_refine_ls_shift/su_mean          0.000
 
loop_
 _atom_site_label
 _atom_site_type_symbol
 _atom_site_fract_x
 _atom_site_fract_y
 _atom_site_fract_z
 _atom_site_U_iso_or_equiv
 _atom_site_adp_type
 _atom_site_occupancy
 _atom_site_symmetry_multiplicity
 _atom_site_calc_flag
 _atom_site_refinement_flags
 _atom_site_disorder_assembly
 _atom_site_disorder_group
C1 C 0.3287(3) 0.11533(10) 0.0488(3) 0.0196(7) Uani 1 1 d . . .
C2 C 0.4564(3) 0.10689(11) 0.0323(3) 0.0229(8) Uani 1 1 d . . .
H2 H 0.5282 0.1211 0.0688 0.027 Uiso 1 1 calc R . .
C3 C 0.4537(3) 0.07245(11) -0.0511(3) 0.0251(8) Uani 1 1 d . . .
H3 H 0.5240 0.0599 -0.0784 0.030 Uiso 1 1 calc R . .
C4 C 0.3260(3) 0.06077(10) -0.0850(3) 0.0243(8) Uani 1 1 d . . .
H4 H 0.2980 0.0392 -0.1391 0.029 Uiso 1 1 calc R . .
C5 C 0.2473(3) 0.08701(10) -0.0235(3) 0.0225(8) Uani 1 1 d . . .
H5 H 0.1592 0.0859 -0.0294 0.027 Uiso 1 1 calc R . .
C6 C 0.2956(3) 0.18730(11) -0.1641(3) 0.0251(8) Uani 1 1 d . . .
H6 H 0.2635 0.2074 -0.1149 0.030 Uiso 1 1 calc R . .
C7 C 0.4252(3) 0.18189(11) -0.1778(3) 0.0272(8) Uani 1 1 d . . .
H7 H 0.4930 0.1976 -0.1395 0.033 Uiso 1 1 calc R . .
C8 C 0.4327(3) 0.14786(11) -0.2610(3) 0.0265(8) Uani 1 1 d . . .
H8 H 0.5066 0.1375 -0.2869 0.032 Uiso 1 1 calc R . .
C9 C 0.3077(3) 0.13260(11) -0.2976(3) 0.0287(9) Uani 1 1 d . . .
H9 H 0.2856 0.1104 -0.3514 0.034 Uiso 1 1 calc R . .
C10 C 0.2225(3) 0.15700(11) -0.2379(3) 0.0276(8) Uani 1 1 d . . .
H10 H 0.1348 0.1538 -0.2457 0.033 Uiso 1 1 calc R . .
C11 C 0.4830(3) 0.19197(10) 0.2381(3) 0.0217(8) Uani 1 1 d . . .
C12 C 0.5903(3) 0.19099(11) 0.3194(4) 0.0310(9) Uani 1 1 d . . .
H12 H 0.5974 0.1699 0.3780 0.037 Uiso 1 1 calc R . .
C13 C 0.6872(4) 0.22086(13) 0.3149(4) 0.0423(11) Uani 1 1 d . . .
H13 H 0.7587 0.2199 0.3704 0.051 Uiso 1 1 calc R . .
C14 C 0.6782(4) 0.25156(13) 0.2295(4) 0.0421(11) Uani 1 1 d . . .
H14 H 0.7429 0.2719 0.2274 0.051 Uiso 1 1 calc R . .
C15 C 0.5725(4) 0.25271(12) 0.1452(4) 0.0366(10) Uani 1 1 d . . .
H15 H 0.5678 0.2734 0.0857 0.044 Uiso 1 1 calc R . .
C16 C 0.4737(3) 0.22302(11) 0.1495(3) 0.0276(8) Uani 1 1 d . . .
H16 H 0.4023 0.2239 0.0938 0.033 Uiso 1 1 calc R . .
C17 C 0.2308(3) 0.18542(10) 0.3088(3) 0.0204(7) Uani 1 1 d . . .
C18 C 0.2157(4) 0.18140(12) 0.4259(3) 0.0310(9) Uani 1 1 d . . .
H18 H 0.2693 0.1631 0.4739 0.037 Uiso 1 1 calc R . .
C19 C 0.1217(4) 0.20438(12) 0.4715(4) 0.0366(10) Uani 1 1 d . . .
H19 H 0.1115 0.2013 0.5498 0.044 Uiso 1 1 calc R . .
C20 C 0.0435(4) 0.23163(12) 0.4019(4) 0.0347(10) Uani 1 1 d . . .
H20 H -0.0203 0.2468 0.4330 0.042 Uiso 1 1 calc R . .
C21 C 0.0586(3) 0.23691(11) 0.2844(4) 0.0304(9) Uani 1 1 d . . .
H21 H 0.0064 0.2561 0.2377 0.037 Uiso 1 1 calc R . .
C22 C 0.1517(3) 0.21345(11) 0.2378(3) 0.0255(8) Uani 1 1 d . . .
H22 H 0.1614 0.2164 0.1594 0.031 Uiso 1 1 calc R . .
C23 C -0.1185(3) 0.13246(10) -0.1058(3) 0.0197(7) Uani 1 1 d . . .
C24 C -0.2487(3) 0.13739(10) -0.0919(3) 0.0205(7) Uani 1 1 d . . .
H24 H -0.3168 0.1221 -0.1314 0.025 Uiso 1 1 calc R . .
C25 C -0.2546(3) 0.17004(10) -0.0061(3) 0.0227(8) Uani 1 1 d . . .
H25 H -0.3283 0.1802 0.0204 0.027 Uiso 1 1 calc R . .
C26 C -0.1303(3) 0.18461(10) 0.0327(3) 0.0239(8) Uani 1 1 d . . .
H26 H -0.1082 0.2058 0.0895 0.029 Uiso 1 1 calc R . .
C27 C -0.0441(3) 0.16122(10) -0.0305(3) 0.0223(8) Uani 1 1 d . . .
H27 H 0.0437 0.1644 -0.0231 0.027 Uiso 1 1 calc R . .
C28 C -0.0827(4) 0.05738(12) 0.1022(3) 0.0326(9) Uani 1 1 d . . .
H28 H -0.0489 0.0379 0.0525 0.039 Uiso 1 1 calc R . .
C29 C -0.2132(4) 0.06174(12) 0.1166(3) 0.0325(9) Uani 1 1 d . . .
H29 H -0.2802 0.0458 0.0775 0.039 Uiso 1 1 calc R . .
C30 C -0.2227(4) 0.09487(12) 0.2017(3) 0.0355(10) Uani 1 1 d . . .
H30 H -0.2970 0.1042 0.2288 0.043 Uiso 1 1 calc R . .
C31 C -0.1000(4) 0.11097(12) 0.2373(3) 0.0332(9) Uani 1 1 d . . .
H31 H -0.0793 0.1331 0.2916 0.040 Uiso 1 1 calc R . .
C32 C -0.0136(4) 0.08796(12) 0.1771(3) 0.0318(9) Uani 1 1 d . . .
H32 H 0.0738 0.0922 0.1852 0.038 Uiso 1 1 calc R . .
C33 C -0.0036(3) 0.06977(10) -0.3744(3) 0.0187(7) Uani 1 1 d . . .
C34 C 0.0483(3) 0.03238(11) -0.3187(3) 0.0266(8) Uani 1 1 d . . .
H34 H 0.0219 0.0235 -0.2486 0.032 Uiso 1 1 calc R . .
C35 C 0.1387(3) 0.00836(11) -0.3669(3) 0.0281(8) Uani 1 1 d . . .
H35 H 0.1731 -0.0166 -0.3293 0.034 Uiso 1 1 calc R . .
C36 C 0.1782(3) 0.02150(11) -0.4710(3) 0.0257(8) Uani 1 1 d . . .
H36 H 0.2385 0.0051 -0.5037 0.031 Uiso 1 1 calc R . .
C37 C 0.1291(3) 0.05843(12) -0.5261(3) 0.0288(8) Uani 1 1 d . . .
H37 H 0.1569 0.0674 -0.5953 0.035 Uiso 1 1 calc R . .
C38 C 0.0372(3) 0.08253(11) -0.4782(3) 0.0251(8) Uani 1 1 d . . .
H38 H 0.0030 0.1074 -0.5164 0.030 Uiso 1 1 calc R . .
C39 C -0.2605(3) 0.06493(10) -0.3126(3) 0.0194(7) Uani 1 1 d . . .
C40 C -0.2572(3) 0.03196(10) -0.2290(3) 0.0234(8) Uani 1 1 d . . .
H40 H -0.1857 0.0287 -0.1742 0.028 Uiso 1 1 calc R . .
C41 C -0.3600(3) 0.00399(11) -0.2270(3) 0.0263(8) Uani 1 1 d . . .
H41 H -0.3572 -0.0180 -0.1711 0.032 Uiso 1 1 calc R . .
C42 C -0.4669(3) 0.00883(11) -0.3084(3) 0.0287(9) Uani 1 1 d . . .
H42 H -0.5355 -0.0100 -0.3071 0.034 Uiso 1 1 calc R . .
C43 C -0.4717(3) 0.04155(11) -0.3913(3) 0.0277(8) Uani 1 1 d . . .
H43 H -0.5439 0.0450 -0.4452 0.033 Uiso 1 1 calc R . .
C44 C -0.3680(3) 0.06938(11) -0.3941(3) 0.0228(8) Uani 1 1 d . . .
H44 H -0.3707 0.0911 -0.4508 0.027 Uiso 1 1 calc R . .
O1 O 0.2849(2) 0.14667(7) 0.12172(19) 0.0223(5) Uani 1 1 d . . .
O2 O -0.0659(2) 0.10408(7) -0.18259(19) 0.0198(5) Uani 1 1 d . . .
P1 P 0.35452(8) 0.15446(3) 0.25275(8) 0.0192(2) Uani 1 1 d . . .
P2 P -0.12651(8) 0.10063(3) -0.31786(8) 0.0189(2) Uani 1 1 d . . .
S1 S 0.40871(9) 0.10278(3) 0.34055(8) 0.0277(2) Uani 1 1 d . . .
S2 S -0.16868(9) 0.15535(3) -0.39749(8) 0.0264(2) Uani 1 1 d . . .
Fe1 Fe 0.35175(4) 0.124989(15) -0.12116(4) 0.02010(13) Uani 1 1 d . . .
Fe2 Fe -0.14385(5) 0.119357(15) 0.06206(4) 0.02054(13) Uani 1 1 d . . .
 
loop_
 _atom_site_aniso_label
 _atom_site_aniso_U_11
 _atom_site_aniso_U_22
 _atom_site_aniso_U_33
 _atom_site_aniso_U_23
 _atom_site_aniso_U_13
 _atom_site_aniso_U_12
C1 0.0205(17) 0.0180(16) 0.0193(18) 0.0000(15) -0.0010(15) 0.0017(14)
C2 0.0207(17) 0.0276(18) 0.0191(18) 0.0020(15) -0.0022(15) 0.0008(15)
C3 0.0263(19) 0.0283(18) 0.0210(19) 0.0022(16) 0.0037(16) 0.0085(16)
C4 0.035(2) 0.0167(16) 0.0206(18) -0.0021(15) 0.0004(17) 0.0008(15)
C5 0.0236(18) 0.0234(17) 0.0197(18) 0.0014(15) -0.0008(15) -0.0024(15)
C6 0.0275(19) 0.0250(18) 0.0228(19) 0.0036(16) 0.0028(17) 0.0061(15)
C7 0.030(2) 0.0283(18) 0.0235(19) 0.0050(17) 0.0015(17) -0.0026(16)
C8 0.0226(19) 0.037(2) 0.0188(18) 0.0048(17) 0.0001(16) 0.0038(16)
C9 0.036(2) 0.0286(19) 0.0189(19) 0.0003(16) -0.0044(17) -0.0021(16)
C10 0.0209(18) 0.035(2) 0.025(2) 0.0061(17) -0.0032(16) 0.0014(16)
C11 0.0238(18) 0.0176(16) 0.0246(19) -0.0041(15) 0.0070(16) 0.0007(14)
C12 0.0250(19) 0.0288(19) 0.038(2) 0.0003(18) 0.0003(18) -0.0012(16)
C13 0.024(2) 0.041(2) 0.061(3) -0.003(2) 0.001(2) -0.0070(18)
C14 0.031(2) 0.033(2) 0.066(3) -0.015(2) 0.020(2) -0.0132(18)
C15 0.054(3) 0.0221(18) 0.039(2) -0.0001(18) 0.029(2) -0.0002(18)
C16 0.033(2) 0.0245(18) 0.027(2) -0.0003(17) 0.0092(18) 0.0021(16)
C17 0.0192(17) 0.0173(16) 0.0246(19) -0.0043(15) 0.0022(16) -0.0040(14)
C18 0.040(2) 0.0291(19) 0.026(2) 0.0019(17) 0.0106(19) 0.0014(17)
C19 0.051(3) 0.031(2) 0.032(2) -0.0052(19) 0.023(2) -0.0053(19)
C20 0.029(2) 0.0280(19) 0.051(3) -0.018(2) 0.020(2) -0.0083(17)
C21 0.0195(18) 0.0278(19) 0.041(2) -0.0128(18) -0.0073(18) -0.0014(15)
C22 0.0218(18) 0.0305(19) 0.0229(19) -0.0056(16) -0.0021(16) -0.0009(15)
C23 0.0207(17) 0.0192(16) 0.0191(18) -0.0002(15) 0.0022(15) 0.0025(13)
C24 0.0205(17) 0.0224(16) 0.0169(17) 0.0027(15) -0.0044(15) -0.0003(14)
C25 0.0236(18) 0.0236(17) 0.0209(19) 0.0003(16) 0.0030(16) 0.0035(15)
C26 0.032(2) 0.0181(16) 0.0218(19) -0.0015(15) 0.0061(17) -0.0001(15)
C27 0.0225(18) 0.0194(16) 0.0249(19) -0.0014(15) 0.0030(16) -0.0066(14)
C28 0.044(2) 0.0249(18) 0.029(2) 0.0088(17) 0.005(2) 0.0094(17)
C29 0.038(2) 0.0287(19) 0.030(2) 0.0118(18) 0.0010(19) -0.0042(17)
C30 0.038(2) 0.042(2) 0.030(2) 0.0182(19) 0.0140(19) 0.0118(19)
C31 0.046(2) 0.034(2) 0.0191(19) 0.0024(17) -0.0013(19) 0.0047(18)
C32 0.030(2) 0.040(2) 0.024(2) 0.0117(18) -0.0013(17) 0.0047(17)
C33 0.0198(17) 0.0170(16) 0.0183(18) -0.0045(14) -0.0016(15) -0.0037(13)
C34 0.028(2) 0.0280(18) 0.025(2) 0.0035(16) 0.0067(17) 0.0020(15)
C35 0.0260(19) 0.0245(17) 0.033(2) 0.0007(17) 0.0011(18) 0.0065(15)
C36 0.0198(18) 0.0292(19) 0.028(2) -0.0140(17) 0.0039(17) -0.0023(15)
C37 0.027(2) 0.041(2) 0.0192(19) -0.0020(17) 0.0040(17) -0.0025(17)
C38 0.0279(19) 0.0259(18) 0.0201(19) 0.0005(16) -0.0026(16) 0.0015(16)
C39 0.0199(17) 0.0191(16) 0.0187(18) -0.0059(14) 0.0010(15) 0.0021(14)
C40 0.0228(18) 0.0250(17) 0.0218(19) -0.0059(16) 0.0005(16) 0.0007(15)
C41 0.032(2) 0.0188(17) 0.028(2) -0.0015(16) 0.0045(18) -0.0002(15)
C42 0.0252(19) 0.0253(18) 0.036(2) -0.0098(18) 0.0060(18) -0.0058(15)
C43 0.0211(18) 0.0279(19) 0.032(2) -0.0110(17) -0.0045(17) 0.0017(15)
C44 0.0243(18) 0.0243(17) 0.0189(18) -0.0040(15) -0.0006(16) 0.0060(14)
O1 0.0244(12) 0.0240(12) 0.0183(12) -0.0045(10) 0.0019(11) 0.0046(10)
O2 0.0197(11) 0.0220(11) 0.0174(12) -0.0032(10) 0.0017(10) 0.0016(9)
P1 0.0201(4) 0.0189(4) 0.0181(5) -0.0010(4) 0.0008(4) -0.0004(4)
P2 0.0198(4) 0.0190(4) 0.0169(4) -0.0004(4) -0.0008(4) 0.0011(3)
S1 0.0324(5) 0.0226(4) 0.0274(5) 0.0056(4) 0.0005(4) 0.0024(4)
S2 0.0303(5) 0.0220(4) 0.0256(5) 0.0036(4) -0.0007(4) 0.0039(4)
Fe1 0.0205(3) 0.0212(2) 0.0180(3) -0.0007(2) -0.0001(2) 0.0008(2)
Fe2 0.0217(3) 0.0224(2) 0.0168(3) 0.0010(2) -0.0002(2) 0.0002(2)
 
_geom_special_details
;
 All esds (except the esd in the dihedral angle between two l.s. planes)
 are estimated using the full covariance matrix.  The cell esds are taken
 into account individually in the estimation of esds in distances, angles
 and torsion angles; correlations between esds in cell parameters are only
 used when they are defined by crystal symmetry.  An approximate (isotropic)
 treatment of cell esds is used for estimating esds involving l.s. planes.
;
 
loop_
 _geom_bond_atom_site_label_1
 _geom_bond_atom_site_label_2
 _geom_bond_distance
 _geom_bond_site_symmetry_2
 _geom_bond_publ_flag
C1 O1 1.394(4) . ?
C1 C2 1.417(5) . ?
C1 C5 1.418(4) . ?
C1 Fe1 2.032(3) . ?
C2 C3 1.425(5) . ?
C2 Fe1 2.046(3) . ?
C2 H2 0.9300 . ?
C3 C4 1.408(5) . ?
C3 Fe1 2.045(3) . ?
C3 H3 0.9300 . ?
C4 C5 1.413(5) . ?
C4 Fe1 2.032(3) . ?
C4 H4 0.9300 . ?
C5 Fe1 2.041(3) . ?
C5 H5 0.9300 . ?
C6 C7 1.414(5) . ?
C6 C10 1.421(5) . ?
C6 Fe1 2.037(3) . ?
C6 H6 0.9300 . ?
C7 C8 1.426(5) . ?
C7 Fe1 2.047(3) . ?
C7 H7 0.9300 . ?
C8 C9 1.419(5) . ?
C8 Fe1 2.048(4) . ?
C8 H8 0.9300 . ?
C9 C10 1.417(5) . ?
C9 Fe1 2.046(4) . ?
C9 H9 0.9300 . ?
C10 Fe1 2.046(3) . ?
C10 H10 0.9300 . ?
C11 C12 1.382(5) . ?
C11 C16 1.390(5) . ?
C11 P1 1.806(3) . ?
C12 C13 1.381(5) . ?
C12 H12 0.9300 . ?
C13 C14 1.356(6) . ?
C13 H13 0.9300 . ?
C14 C15 1.389(6) . ?
C14 H14 0.9300 . ?
C15 C16 1.393(5) . ?
C15 H15 0.9300 . ?
C16 H16 0.9300 . ?
C17 C18 1.389(5) . ?
C17 C22 1.391(5) . ?
C17 P1 1.805(3) . ?
C18 C19 1.378(5) . ?
C18 H18 0.9300 . ?
C19 C20 1.363(6) . ?
C19 H19 0.9300 . ?
C20 C21 1.397(5) . ?
C20 H20 0.9300 . ?
C21 C22 1.384(5) . ?
C21 H21 0.9300 . ?
C22 H22 0.9300 . ?
C23 C27 1.406(4) . ?
C23 O2 1.407(4) . ?
C23 C24 1.420(4) . ?
C23 Fe2 2.032(3) . ?
C24 C25 1.413(5) . ?
C24 Fe2 2.050(3) . ?
C24 H24 0.9300 . ?
C25 C26 1.410(5) . ?
C25 Fe2 2.041(3) . ?
C25 H25 0.9300 . ?
C26 C27 1.432(5) . ?
C26 Fe2 2.030(3) . ?
C26 H26 0.9300 . ?
C27 Fe2 2.047(3) . ?
C27 H27 0.9300 . ?
C28 C32 1.413(5) . ?
C28 C29 1.423(5) . ?
C28 Fe2 2.036(3) . ?
C28 H28 0.9300 . ?
C29 C30 1.424(5) . ?
C29 Fe2 2.039(4) . ?
C29 H29 0.9300 . ?
C30 C31 1.404(5) . ?
C30 Fe2 2.051(4) . ?
C30 H30 0.9300 . ?
C31 C32 1.407(5) . ?
C31 Fe2 2.036(4) . ?
C31 H31 0.9300 . ?
C32 Fe2 2.033(4) . ?
C32 H32 0.9300 . ?
C33 C38 1.383(5) . ?
C33 C34 1.390(5) . ?
C33 P2 1.799(3) . ?
C34 C35 1.381(5) . ?
C34 H34 0.9300 . ?
C35 C36 1.383(5) . ?
C35 H35 0.9300 . ?
C36 C37 1.366(5) . ?
C36 H36 0.9300 . ?
C37 C38 1.391(5) . ?
C37 H37 0.9300 . ?
C38 H38 0.9300 . ?
C39 C44 1.391(4) . ?
C39 C40 1.393(5) . ?
C39 P2 1.800(3) . ?
C40 C41 1.389(5) . ?
C40 H40 0.9300 . ?
C41 C42 1.386(5) . ?
C41 H41 0.9300 . ?
C42 C43 1.381(5) . ?
C42 H42 0.9300 . ?
C43 C44 1.395(5) . ?
C43 H43 0.9300 . ?
C44 H44 0.9300 . ?
O1 P1 1.616(2) . ?
O2 P2 1.617(2) . ?
P1 S1 1.9249(12) . ?
P2 S2 1.9333(12) . ?
 
loop_
 _geom_angle_atom_site_label_1
 _geom_angle_atom_site_label_2
 _geom_angle_atom_site_label_3
 _geom_angle
 _geom_angle_site_symmetry_1
 _geom_angle_site_symmetry_3
 _geom_angle_publ_flag
O1 C1 C2 127.2(3) . . ?
O1 C1 C5 123.4(3) . . ?
C2 C1 C5 109.3(3) . . ?
O1 C1 Fe1 125.1(2) . . ?
C2 C1 Fe1 70.2(2) . . ?
C5 C1 Fe1 69.98(19) . . ?
C1 C2 C3 106.7(3) . . ?
C1 C2 Fe1 69.15(19) . . ?
C3 C2 Fe1 69.58(19) . . ?
C1 C2 H2 126.6 . . ?
C3 C2 H2 126.6 . . ?
Fe1 C2 H2 126.2 . . ?
C4 C3 C2 108.2(3) . . ?
C4 C3 Fe1 69.31(19) . . ?
C2 C3 Fe1 69.65(19) . . ?
C4 C3 H3 125.9 . . ?
C2 C3 H3 125.9 . . ?
Fe1 C3 H3 126.7 . . ?
C3 C4 C5 109.0(3) . . ?
C3 C4 Fe1 70.28(19) . . ?
C5 C4 Fe1 70.07(19) . . ?
C3 C4 H4 125.5 . . ?
C5 C4 H4 125.5 . . ?
Fe1 C4 H4 125.7 . . ?
C4 C5 C1 106.7(3) . . ?
C4 C5 Fe1 69.34(19) . . ?
C1 C5 Fe1 69.28(19) . . ?
C4 C5 H5 126.6 . . ?
C1 C5 H5 126.6 . . ?
Fe1 C5 H5 126.3 . . ?
C7 C6 C10 108.8(3) . . ?
C7 C6 Fe1 70.09(19) . . ?
C10 C6 Fe1 69.98(19) . . ?
C7 C6 H6 125.6 . . ?
C10 C6 H6 125.6 . . ?
Fe1 C6 H6 125.9 . . ?
C6 C7 C8 107.4(3) . . ?
C6 C7 Fe1 69.4(2) . . ?
C8 C7 Fe1 69.7(2) . . ?
C6 C7 H7 126.3 . . ?
C8 C7 H7 126.3 . . ?
Fe1 C7 H7 126.2 . . ?
C9 C8 C7 108.1(3) . . ?
C9 C8 Fe1 69.7(2) . . ?
C7 C8 Fe1 69.6(2) . . ?
C9 C8 H8 126.0 . . ?
C7 C8 H8 126.0 . . ?
Fe1 C8 H8 126.4 . . ?
C10 C9 C8 108.2(3) . . ?
C10 C9 Fe1 69.7(2) . . ?
C8 C9 Fe1 69.8(2) . . ?
C10 C9 H9 125.9 . . ?
C8 C9 H9 125.9 . . ?
Fe1 C9 H9 126.2 . . ?
C9 C10 C6 107.5(3) . . ?
C9 C10 Fe1 69.7(2) . . ?
C6 C10 Fe1 69.30(19) . . ?
C9 C10 H10 126.2 . . ?
C6 C10 H10 126.2 . . ?
Fe1 C10 H10 126.3 . . ?
C12 C11 C16 119.4(3) . . ?
C12 C11 P1 119.3(3) . . ?
C16 C11 P1 121.2(3) . . ?
C13 C12 C11 120.9(4) . . ?
C13 C12 H12 119.6 . . ?
C11 C12 H12 119.6 . . ?
C14 C13 C12 120.1(4) . . ?
C14 C13 H13 120.0 . . ?
C12 C13 H13 120.0 . . ?
C13 C14 C15 120.2(4) . . ?
C13 C14 H14 119.9 . . ?
C15 C14 H14 119.9 . . ?
C14 C15 C16 120.2(4) . . ?
C14 C15 H15 119.9 . . ?
C16 C15 H15 119.9 . . ?
C11 C16 C15 119.1(4) . . ?
C11 C16 H16 120.4 . . ?
C15 C16 H16 120.4 . . ?
C18 C17 C22 119.6(3) . . ?
C18 C17 P1 118.9(3) . . ?
C22 C17 P1 121.6(3) . . ?
C19 C18 C17 120.4(4) . . ?
C19 C18 H18 119.8 . . ?
C17 C18 H18 119.8 . . ?
C20 C19 C18 120.1(4) . . ?
C20 C19 H19 119.9 . . ?
C18 C19 H19 119.9 . . ?
C19 C20 C21 120.5(3) . . ?
C19 C20 H20 119.8 . . ?
C21 C20 H20 119.8 . . ?
C22 C21 C20 119.6(4) . . ?
C22 C21 H21 120.2 . . ?
C20 C21 H21 120.2 . . ?
C21 C22 C17 119.8(4) . . ?
C21 C22 H22 120.1 . . ?
C17 C22 H22 120.1 . . ?
C27 C23 O2 122.6(3) . . ?
C27 C23 C24 110.0(3) . . ?
O2 C23 C24 127.4(3) . . ?
C27 C23 Fe2 70.4(2) . . ?
O2 C23 Fe2 126.3(2) . . ?
C24 C23 Fe2 70.36(19) . . ?
C25 C24 C23 106.5(3) . . ?
C25 C24 Fe2 69.43(19) . . ?
C23 C24 Fe2 68.94(19) . . ?
C25 C24 H24 126.7 . . ?
C23 C24 H24 126.7 . . ?
Fe2 C24 H24 126.5 . . ?
C26 C25 C24 108.8(3) . . ?
C26 C25 Fe2 69.34(19) . . ?
C24 C25 Fe2 70.15(18) . . ?
C26 C25 H25 125.6 . . ?
C24 C25 H25 125.6 . . ?
Fe2 C25 H25 126.5 . . ?
C25 C26 C27 108.3(3) . . ?
C25 C26 Fe2 70.13(19) . . ?
C27 C26 Fe2 70.04(18) . . ?
C25 C26 H26 125.9 . . ?
C27 C26 H26 125.9 . . ?
Fe2 C26 H26 125.5 . . ?
C23 C27 C26 106.4(3) . . ?
C23 C27 Fe2 69.25(19) . . ?
C26 C27 Fe2 68.83(19) . . ?
C23 C27 H27 126.8 . . ?
C26 C27 H27 126.8 . . ?
Fe2 C27 H27 126.6 . . ?
C32 C28 C29 107.7(3) . . ?
C32 C28 Fe2 69.5(2) . . ?
C29 C28 Fe2 69.7(2) . . ?
C32 C28 H28 126.2 . . ?
C29 C28 H28 126.2 . . ?
Fe2 C28 H28 126.2 . . ?
C28 C29 C30 107.6(3) . . ?
C28 C29 Fe2 69.5(2) . . ?
C30 C29 Fe2 70.1(2) . . ?
C28 C29 H29 126.2 . . ?
C30 C29 H29 126.2 . . ?
Fe2 C29 H29 125.8 . . ?
C31 C30 C29 107.9(3) . . ?
C31 C30 Fe2 69.3(2) . . ?
C29 C30 Fe2 69.2(2) . . ?
C31 C30 H30 126.1 . . ?
C29 C30 H30 126.1 . . ?
Fe2 C30 H30 127.0 . . ?
C30 C31 C32 108.6(3) . . ?
C30 C31 Fe2 70.5(2) . . ?
C32 C31 Fe2 69.6(2) . . ?
C30 C31 H31 125.7 . . ?
C32 C31 H31 125.7 . . ?
Fe2 C31 H31 125.7 . . ?
C31 C32 C28 108.3(3) . . ?
C31 C32 Fe2 69.9(2) . . ?
C28 C32 Fe2 69.8(2) . . ?
C31 C32 H32 125.9 . . ?
C28 C32 H32 125.9 . . ?
Fe2 C32 H32 126.0 . . ?
C38 C33 C34 119.0(3) . . ?
C38 C33 P2 119.3(2) . . ?
C34 C33 P2 121.7(3) . . ?
C35 C34 C33 120.3(3) . . ?
C35 C34 H34 119.9 . . ?
C33 C34 H34 119.9 . . ?
C34 C35 C36 120.0(3) . . ?
C34 C35 H35 120.0 . . ?
C36 C35 H35 120.0 . . ?
C37 C36 C35 120.4(3) . . ?
C37 C36 H36 119.8 . . ?
C35 C36 H36 119.8 . . ?
C36 C37 C38 119.8(3) . . ?
C36 C37 H37 120.1 . . ?
C38 C37 H37 120.1 . . ?
C33 C38 C37 120.5(3) . . ?
C33 C38 H38 119.7 . . ?
C37 C38 H38 119.7 . . ?
C44 C39 C40 119.1(3) . . ?
C44 C39 P2 120.1(3) . . ?
C40 C39 P2 120.7(2) . . ?
C41 C40 C39 120.3(3) . . ?
C41 C40 H40 119.8 . . ?
C39 C40 H40 119.8 . . ?
C42 C41 C40 120.0(3) . . ?
C42 C41 H41 120.0 . . ?
C40 C41 H41 120.0 . . ?
C43 C42 C41 120.2(3) . . ?
C43 C42 H42 119.9 . . ?
C41 C42 H42 119.9 . . ?
C42 C43 C44 119.8(3) . . ?
C42 C43 H43 120.1 . . ?
C44 C43 H43 120.1 . . ?
C39 C44 C43 120.4(3) . . ?
C39 C44 H44 119.8 . . ?
C43 C44 H44 119.8 . . ?
C1 O1 P1 121.30(19) . . ?
C23 O2 P2 120.63(19) . . ?
O1 P1 C17 98.41(14) . . ?
O1 P1 C11 105.46(15) . . ?
C17 P1 C11 107.09(15) . . ?
O1 P1 S1 116.33(9) . . ?
C17 P1 S1 115.05(12) . . ?
C11 P1 S1 113.04(12) . . ?
O2 P2 C33 99.64(13) . . ?
O2 P2 C39 103.05(14) . . ?
C33 P2 C39 107.93(14) . . ?
O2 P2 S2 116.33(9) . . ?
C33 P2 S2 114.53(12) . . ?
C39 P2 S2 113.83(11) . . ?
C4 Fe1 C1 67.97(13) . . ?
C4 Fe1 C6 155.46(14) . . ?
C1 Fe1 C6 107.68(13) . . ?
C4 Fe1 C5 40.59(13) . . ?
C1 Fe1 C5 40.73(12) . . ?
C6 Fe1 C5 120.21(14) . . ?
C4 Fe1 C3 40.41(13) . . ?
C1 Fe1 C3 68.03(13) . . ?
C6 Fe1 C3 162.52(14) . . ?
C5 Fe1 C3 68.41(13) . . ?
C4 Fe1 C2 68.47(14) . . ?
C1 Fe1 C2 40.68(13) . . ?
C6 Fe1 C2 125.00(14) . . ?
C5 Fe1 C2 68.93(13) . . ?
C3 Fe1 C2 40.77(13) . . ?
C4 Fe1 C9 107.17(14) . . ?
C1 Fe1 C9 159.97(14) . . ?
C6 Fe1 C9 68.19(14) . . ?
C5 Fe1 C9 122.97(14) . . ?
C3 Fe1 C9 121.75(14) . . ?
C2 Fe1 C9 157.60(14) . . ?
C4 Fe1 C10 120.06(14) . . ?
C1 Fe1 C10 123.62(14) . . ?
C6 Fe1 C10 40.71(14) . . ?
C5 Fe1 C10 105.70(14) . . ?
C3 Fe1 C10 155.92(14) . . ?
C2 Fe1 C10 160.99(14) . . ?
C9 Fe1 C10 40.51(14) . . ?
C4 Fe1 C7 162.33(15) . . ?
C1 Fe1 C7 122.01(14) . . ?
C6 Fe1 C7 40.51(13) . . ?
C5 Fe1 C7 156.25(14) . . ?
C3 Fe1 C7 126.14(14) . . ?
C2 Fe1 C7 108.65(14) . . ?
C9 Fe1 C7 68.46(14) . . ?
C10 Fe1 C7 68.52(14) . . ?
C4 Fe1 C8 124.96(14) . . ?
C1 Fe1 C8 157.99(13) . . ?
C6 Fe1 C8 68.15(14) . . ?
C5 Fe1 C8 160.44(14) . . ?
C3 Fe1 C8 109.07(14) . . ?
C2 Fe1 C8 122.72(14) . . ?
C9 Fe1 C8 40.55(14) . . ?
C10 Fe1 C8 68.26(14) . . ?
C7 Fe1 C8 40.76(14) . . ?
C26 Fe2 C23 68.03(13) . . ?
C26 Fe2 C32 121.08(15) . . ?
C23 Fe2 C32 123.78(14) . . ?
C26 Fe2 C31 106.14(15) . . ?
C23 Fe2 C31 158.95(15) . . ?
C32 Fe2 C31 40.48(15) . . ?
C26 Fe2 C28 157.51(15) . . ?
C23 Fe2 C28 108.90(14) . . ?
C32 Fe2 C28 40.65(15) . . ?
C31 Fe2 C28 68.30(15) . . ?
C26 Fe2 C29 159.31(15) . . ?
C23 Fe2 C29 124.22(14) . . ?
C32 Fe2 C29 68.43(15) . . ?
C31 Fe2 C29 68.25(15) . . ?
C28 Fe2 C29 40.86(15) . . ?
C26 Fe2 C25 40.53(13) . . ?
C23 Fe2 C25 67.77(13) . . ?
C32 Fe2 C25 157.08(15) . . ?
C31 Fe2 C25 121.81(15) . . ?
C28 Fe2 C25 160.90(15) . . ?
C29 Fe2 C25 124.17(14) . . ?
C26 Fe2 C27 41.13(13) . . ?
C23 Fe2 C27 40.34(13) . . ?
C32 Fe2 C27 106.42(14) . . ?
C31 Fe2 C27 122.03(15) . . ?
C28 Fe2 C27 121.94(15) . . ?
C29 Fe2 C27 158.80(15) . . ?
C25 Fe2 C27 68.60(13) . . ?
C26 Fe2 C24 68.48(13) . . ?
C23 Fe2 C24 40.71(13) . . ?
C32 Fe2 C24 160.64(15) . . ?
C31 Fe2 C24 158.01(15) . . ?
C28 Fe2 C24 124.75(14) . . ?
C29 Fe2 C24 108.83(14) . . ?
C25 Fe2 C24 40.42(13) . . ?
C27 Fe2 C24 68.82(13) . . ?
C26 Fe2 C30 122.29(15) . . ?
C23 Fe2 C30 160.01(15) . . ?
C32 Fe2 C30 67.97(15) . . ?
C31 Fe2 C30 40.19(15) . . ?
C28 Fe2 C30 68.39(15) . . ?
C29 Fe2 C30 40.74(15) . . ?
C25 Fe2 C30 107.91(14) . . ?
C27 Fe2 C30 158.27(15) . . ?
C24 Fe2 C30 123.34(15) . . ?
 
loop_
 _geom_torsion_atom_site_label_1
 _geom_torsion_atom_site_label_2
 _geom_torsion_atom_site_label_3
 _geom_torsion_atom_site_label_4
 _geom_torsion
 _geom_torsion_site_symmetry_1
 _geom_torsion_site_symmetry_2
 _geom_torsion_site_symmetry_3
 _geom_torsion_site_symmetry_4
 _geom_torsion_publ_flag
O1 C1 C2 C3 -179.3(3) . . . . ?
C5 C1 C2 C3 -0.5(4) . . . . ?
Fe1 C1 C2 C3 -59.7(2) . . . . ?
O1 C1 C2 Fe1 -119.6(3) . . . . ?
C5 C1 C2 Fe1 59.2(2) . . . . ?
C1 C2 C3 C4 0.7(4) . . . . ?
Fe1 C2 C3 C4 -58.8(2) . . . . ?
C1 C2 C3 Fe1 59.4(2) . . . . ?
C2 C3 C4 C5 -0.6(4) . . . . ?
Fe1 C3 C4 C5 -59.6(2) . . . . ?
C2 C3 C4 Fe1 59.0(2) . . . . ?
C3 C4 C5 C1 0.2(4) . . . . ?
Fe1 C4 C5 C1 -59.5(2) . . . . ?
C3 C4 C5 Fe1 59.7(2) . . . . ?
O1 C1 C5 C4 179.0(3) . . . . ?
C2 C1 C5 C4 0.2(4) . . . . ?
Fe1 C1 C5 C4 59.5(2) . . . . ?
O1 C1 C5 Fe1 119.5(3) . . . . ?
C2 C1 C5 Fe1 -59.3(2) . . . . ?
C10 C6 C7 C8 0.0(4) . . . . ?
Fe1 C6 C7 C8 59.5(2) . . . . ?
C10 C6 C7 Fe1 -59.5(2) . . . . ?
C6 C7 C8 C9 -0.1(4) . . . . ?
Fe1 C7 C8 C9 59.2(2) . . . . ?
C6 C7 C8 Fe1 -59.4(2) . . . . ?
C7 C8 C9 C10 0.2(4) . . . . ?
Fe1 C8 C9 C10 59.4(2) . . . . ?
C7 C8 C9 Fe1 -59.2(2) . . . . ?
C8 C9 C10 C6 -0.2(4) . . . . ?
Fe1 C9 C10 C6 59.2(2) . . . . ?
C8 C9 C10 Fe1 -59.4(2) . . . . ?
C7 C6 C10 C9 0.1(4) . . . . ?
Fe1 C6 C10 C9 -59.5(2) . . . . ?
C7 C6 C10 Fe1 59.6(2) . . . . ?
C16 C11 C12 C13 1.1(5) . . . . ?
P1 C11 C12 C13 -176.2(3) . . . . ?
C11 C12 C13 C14 -0.3(6) . . . . ?
C12 C13 C14 C15 -1.0(6) . . . . ?
C13 C14 C15 C16 1.6(6) . . . . ?
C12 C11 C16 C15 -0.5(5) . . . . ?
P1 C11 C16 C15 176.7(3) . . . . ?
C14 C15 C16 C11 -0.8(5) . . . . ?
C22 C17 C18 C19 1.1(5) . . . . ?
P1 C17 C18 C19 -179.6(3) . . . . ?
C17 C18 C19 C20 -0.7(6) . . . . ?
C18 C19 C20 C21 -0.6(5) . . . . ?
C19 C20 C21 C22 1.5(5) . . . . ?
C20 C21 C22 C17 -1.1(5) . . . . ?
C18 C17 C22 C21 -0.2(5) . . . . ?
P1 C17 C22 C21 -179.5(3) . . . . ?
C27 C23 C24 C25 0.1(4) . . . . ?
O2 C23 C24 C25 -179.2(3) . . . . ?
Fe2 C23 C24 C25 59.5(2) . . . . ?
C27 C23 C24 Fe2 -59.4(2) . . . . ?
O2 C23 C24 Fe2 121.3(3) . . . . ?
C23 C24 C25 C26 -0.5(4) . . . . ?
Fe2 C24 C25 C26 58.7(2) . . . . ?
C23 C24 C25 Fe2 -59.2(2) . . . . ?
C24 C25 C26 C27 0.7(4) . . . . ?
Fe2 C25 C26 C27 59.9(2) . . . . ?
C24 C25 C26 Fe2 -59.2(2) . . . . ?
O2 C23 C27 C26 179.7(3) . . . . ?
C24 C23 C27 C26 0.3(4) . . . . ?
Fe2 C23 C27 C26 -59.1(2) . . . . ?
O2 C23 C27 Fe2 -121.3(3) . . . . ?
C24 C23 C27 Fe2 59.4(2) . . . . ?
C25 C26 C27 C23 -0.6(4) . . . . ?
Fe2 C26 C27 C23 59.4(2) . . . . ?
C25 C26 C27 Fe2 -60.0(2) . . . . ?
C32 C28 C29 C30 -0.6(4) . . . . ?
Fe2 C28 C29 C30 -60.0(2) . . . . ?
C32 C28 C29 Fe2 59.4(2) . . . . ?
C28 C29 C30 C31 0.9(4) . . . . ?
Fe2 C29 C30 C31 -58.7(2) . . . . ?
C28 C29 C30 Fe2 59.6(2) . . . . ?
C29 C30 C31 C32 -0.9(4) . . . . ?
Fe2 C30 C31 C32 -59.5(3) . . . . ?
C29 C30 C31 Fe2 58.6(2) . . . . ?
C30 C31 C32 C28 0.5(4) . . . . ?
Fe2 C31 C32 C28 -59.5(2) . . . . ?
C30 C31 C32 Fe2 60.0(3) . . . . ?
C29 C28 C32 C31 0.1(4) . . . . ?
Fe2 C28 C32 C31 59.5(2) . . . . ?
C29 C28 C32 Fe2 -59.5(2) . . . . ?
C38 C33 C34 C35 -0.3(5) . . . . ?
P2 C33 C34 C35 177.3(3) . . . . ?
C33 C34 C35 C36 0.1(5) . . . . ?
C34 C35 C36 C37 0.6(5) . . . . ?
C35 C36 C37 C38 -1.1(5) . . . . ?
C34 C33 C38 C37 -0.2(5) . . . . ?
P2 C33 C38 C37 -177.8(3) . . . . ?
C36 C37 C38 C33 0.9(5) . . . . ?
C44 C39 C40 C41 -0.1(5) . . . . ?
P2 C39 C40 C41 -178.7(3) . . . . ?
C39 C40 C41 C42 -0.1(5) . . . . ?
C40 C41 C42 C43 -0.2(5) . . . . ?
C41 C42 C43 C44 0.9(5) . . . . ?
C40 C39 C44 C43 0.8(5) . . . . ?
P2 C39 C44 C43 179.3(2) . . . . ?
C42 C43 C44 C39 -1.1(5) . . . . ?
C2 C1 O1 P1 -43.6(4) . . . . ?
C5 C1 O1 P1 137.8(3) . . . . ?
Fe1 C1 O1 P1 -134.4(2) . . . . ?
C27 C23 O2 P2 -132.3(3) . . . . ?
C24 C23 O2 P2 47.0(4) . . . . ?
Fe2 C23 O2 P2 139.08(19) . . . . ?
C1 O1 P1 C17 -164.7(2) . . . . ?
C1 O1 P1 C11 84.9(2) . . . . ?
C1 O1 P1 S1 -41.2(2) . . . . ?
C18 C17 P1 O1 147.9(3) . . . . ?
C22 C17 P1 O1 -32.9(3) . . . . ?
C18 C17 P1 C11 -103.0(3) . . . . ?
C22 C17 P1 C11 76.3(3) . . . . ?
C18 C17 P1 S1 23.6(3) . . . . ?
C22 C17 P1 S1 -157.2(2) . . . . ?
C12 C11 P1 O1 -152.1(3) . . . . ?
C16 C11 P1 O1 30.7(3) . . . . ?
C12 C11 P1 C17 103.8(3) . . . . ?
C16 C11 P1 C17 -73.5(3) . . . . ?
C12 C11 P1 S1 -24.0(3) . . . . ?
C16 C11 P1 S1 158.8(2) . . . . ?
C23 O2 P2 C33 168.7(2) . . . . ?
C23 O2 P2 C39 -80.3(2) . . . . ?
C23 O2 P2 S2 45.0(2) . . . . ?
C38 C33 P2 O2 -135.1(3) . . . . ?
C34 C33 P2 O2 47.4(3) . . . . ?
C38 C33 P2 C39 117.7(3) . . . . ?
C34 C33 P2 C39 -59.8(3) . . . . ?
C38 C33 P2 S2 -10.2(3) . . . . ?
C34 C33 P2 S2 172.3(2) . . . . ?
C44 C39 P2 O2 149.6(3) . . . . ?
C40 C39 P2 O2 -31.9(3) . . . . ?
C44 C39 P2 C33 -105.6(3) . . . . ?
C40 C39 P2 C33 72.9(3) . . . . ?
C44 C39 P2 S2 22.7(3) . . . . ?
C40 C39 P2 S2 -158.8(2) . . . . ?
C3 C4 Fe1 C1 -81.5(2) . . . . ?
C5 C4 Fe1 C1 38.37(19) . . . . ?
C3 C4 Fe1 C6 -165.9(3) . . . . ?
C5 C4 Fe1 C6 -46.0(4) . . . . ?
C3 C4 Fe1 C5 -119.9(3) . . . . ?
C5 C4 Fe1 C3 119.9(3) . . . . ?
C3 C4 Fe1 C2 -37.6(2) . . . . ?
C5 C4 Fe1 C2 82.3(2) . . . . ?
C3 C4 Fe1 C9 119.1(2) . . . . ?
C5 C4 Fe1 C9 -121.0(2) . . . . ?
C3 C4 Fe1 C10 161.3(2) . . . . ?
C5 C4 Fe1 C10 -78.8(2) . . . . ?
C3 C4 Fe1 C7 46.3(6) . . . . ?
C5 C4 Fe1 C7 166.2(4) . . . . ?
C3 C4 Fe1 C8 78.1(2) . . . . ?
C5 C4 Fe1 C8 -162.0(2) . . . . ?
O1 C1 Fe1 C4 -155.6(3) . . . . ?
C2 C1 Fe1 C4 82.1(2) . . . . ?
C5 C1 Fe1 C4 -38.24(19) . . . . ?
O1 C1 Fe1 C6 -1.4(3) . . . . ?
C2 C1 Fe1 C6 -123.6(2) . . . . ?
C5 C1 Fe1 C6 116.1(2) . . . . ?
O1 C1 Fe1 C5 -117.4(3) . . . . ?
C2 C1 Fe1 C5 120.4(3) . . . . ?
O1 C1 Fe1 C3 160.6(3) . . . . ?
C2 C1 Fe1 C3 38.41(19) . . . . ?
C5 C1 Fe1 C3 -82.0(2) . . . . ?
O1 C1 Fe1 C2 122.2(3) . . . . ?
C5 C1 Fe1 C2 -120.4(3) . . . . ?
O1 C1 Fe1 C9 -76.0(5) . . . . ?
C2 C1 Fe1 C9 161.8(4) . . . . ?
C5 C1 Fe1 C9 41.4(5) . . . . ?
O1 C1 Fe1 C10 -43.3(3) . . . . ?
C2 C1 Fe1 C10 -165.53(19) . . . . ?
C5 C1 Fe1 C10 74.1(2) . . . . ?
O1 C1 Fe1 C7 40.8(3) . . . . ?
C2 C1 Fe1 C7 -81.4(2) . . . . ?
C5 C1 Fe1 C7 158.18(19) . . . . ?
O1 C1 Fe1 C8 73.9(5) . . . . ?
C2 C1 Fe1 C8 -48.3(4) . . . . ?
C5 C1 Fe1 C8 -168.6(3) . . . . ?
C7 C6 Fe1 C4 -165.6(3) . . . . ?
C10 C6 Fe1 C4 -45.8(4) . . . . ?
C7 C6 Fe1 C1 118.9(2) . . . . ?
C10 C6 Fe1 C1 -121.4(2) . . . . ?
C7 C6 Fe1 C5 161.6(2) . . . . ?
C10 C6 Fe1 C5 -78.7(2) . . . . ?
C7 C6 Fe1 C3 46.1(6) . . . . ?
C10 C6 Fe1 C3 165.8(4) . . . . ?
C7 C6 Fe1 C2 77.4(3) . . . . ?
C10 C6 Fe1 C2 -162.9(2) . . . . ?
C7 C6 Fe1 C9 -81.9(2) . . . . ?
C10 C6 Fe1 C9 37.8(2) . . . . ?
C7 C6 Fe1 C10 -119.7(3) . . . . ?
C10 C6 Fe1 C7 119.7(3) . . . . ?
C7 C6 Fe1 C8 -38.1(2) . . . . ?
C10 C6 Fe1 C8 81.6(2) . . . . ?
C1 C5 Fe1 C4 118.1(3) . . . . ?
C4 C5 Fe1 C1 -118.1(3) . . . . ?
C4 C5 Fe1 C6 159.8(2) . . . . ?
C1 C5 Fe1 C6 -82.1(2) . . . . ?
C4 C5 Fe1 C3 -37.2(2) . . . . ?
C1 C5 Fe1 C3 81.0(2) . . . . ?
C4 C5 Fe1 C2 -81.1(2) . . . . ?
C1 C5 Fe1 C2 37.05(18) . . . . ?
C4 C5 Fe1 C9 77.5(2) . . . . ?
C1 C5 Fe1 C9 -164.34(19) . . . . ?
C4 C5 Fe1 C10 118.1(2) . . . . ?
C1 C5 Fe1 C10 -123.7(2) . . . . ?
C4 C5 Fe1 C7 -169.7(3) . . . . ?
C1 C5 Fe1 C7 -51.5(4) . . . . ?
C4 C5 Fe1 C8 49.1(5) . . . . ?
C1 C5 Fe1 C8 167.3(4) . . . . ?
C2 C3 Fe1 C4 -119.7(3) . . . . ?
C4 C3 Fe1 C1 81.4(2) . . . . ?
C2 C3 Fe1 C1 -38.33(19) . . . . ?
C4 C3 Fe1 C6 160.4(4) . . . . ?
C2 C3 Fe1 C6 40.7(6) . . . . ?
C4 C3 Fe1 C5 37.3(2) . . . . ?
C2 C3 Fe1 C5 -82.4(2) . . . . ?
C4 C3 Fe1 C2 119.7(3) . . . . ?
C4 C3 Fe1 C9 -79.0(2) . . . . ?
C2 C3 Fe1 C9 161.3(2) . . . . ?
C4 C3 Fe1 C10 -42.7(4) . . . . ?
C2 C3 Fe1 C10 -162.4(3) . . . . ?
C4 C3 Fe1 C7 -164.2(2) . . . . ?
C2 C3 Fe1 C7 76.1(2) . . . . ?
C4 C3 Fe1 C8 -122.0(2) . . . . ?
C2 C3 Fe1 C8 118.3(2) . . . . ?
C1 C2 Fe1 C4 -80.8(2) . . . . ?
C3 C2 Fe1 C4 37.3(2) . . . . ?
C3 C2 Fe1 C1 118.1(3) . . . . ?
C1 C2 Fe1 C6 75.8(2) . . . . ?
C3 C2 Fe1 C6 -166.2(2) . . . . ?
C1 C2 Fe1 C5 -37.10(18) . . . . ?
C3 C2 Fe1 C5 81.0(2) . . . . ?
C1 C2 Fe1 C3 -118.1(3) . . . . ?
C1 C2 Fe1 C9 -163.7(3) . . . . ?
C3 C2 Fe1 C9 -45.6(4) . . . . ?
C1 C2 Fe1 C10 39.7(5) . . . . ?
C3 C2 Fe1 C10 157.8(4) . . . . ?
C1 C2 Fe1 C7 117.8(2) . . . . ?
C3 C2 Fe1 C7 -124.2(2) . . . . ?
C1 C2 Fe1 C8 160.58(19) . . . . ?
C3 C2 Fe1 C8 -81.3(2) . . . . ?
C10 C9 Fe1 C4 116.4(2) . . . . ?
C8 C9 Fe1 C4 -124.2(2) . . . . ?
C10 C9 Fe1 C1 43.8(5) . . . . ?
C8 C9 Fe1 C1 163.2(3) . . . . ?
C10 C9 Fe1 C6 -38.0(2) . . . . ?
C8 C9 Fe1 C6 81.4(2) . . . . ?
C10 C9 Fe1 C5 74.8(2) . . . . ?
C8 C9 Fe1 C5 -165.8(2) . . . . ?
C10 C9 Fe1 C3 158.2(2) . . . . ?
C8 C9 Fe1 C3 -82.4(2) . . . . ?
C10 C9 Fe1 C2 -168.5(3) . . . . ?
C8 C9 Fe1 C2 -49.1(4) . . . . ?
C8 C9 Fe1 C10 119.4(3) . . . . ?
C10 C9 Fe1 C7 -81.7(2) . . . . ?
C8 C9 Fe1 C7 37.7(2) . . . . ?
C10 C9 Fe1 C8 -119.4(3) . . . . ?
C9 C10 Fe1 C4 -81.3(2) . . . . ?
C6 C10 Fe1 C4 159.9(2) . . . . ?
C9 C10 Fe1 C1 -163.5(2) . . . . ?
C6 C10 Fe1 C1 77.7(2) . . . . ?
C9 C10 Fe1 C6 118.9(3) . . . . ?
C9 C10 Fe1 C5 -122.8(2) . . . . ?
C6 C10 Fe1 C5 118.3(2) . . . . ?
C9 C10 Fe1 C3 -50.7(4) . . . . ?
C6 C10 Fe1 C3 -169.6(3) . . . . ?
C9 C10 Fe1 C2 166.6(4) . . . . ?
C6 C10 Fe1 C2 47.7(5) . . . . ?
C6 C10 Fe1 C9 -118.9(3) . . . . ?
C9 C10 Fe1 C7 81.6(2) . . . . ?
C6 C10 Fe1 C7 -37.3(2) . . . . ?
C9 C10 Fe1 C8 37.6(2) . . . . ?
C6 C10 Fe1 C8 -81.3(2) . . . . ?
C6 C7 Fe1 C4 160.1(4) . . . . ?
C8 C7 Fe1 C4 41.4(6) . . . . ?
C6 C7 Fe1 C1 -79.6(2) . . . . ?
C8 C7 Fe1 C1 161.69(19) . . . . ?
C8 C7 Fe1 C6 -118.7(3) . . . . ?
C6 C7 Fe1 C5 -42.6(4) . . . . ?
C8 C7 Fe1 C5 -161.3(3) . . . . ?
C6 C7 Fe1 C3 -164.5(2) . . . . ?
C8 C7 Fe1 C3 76.9(2) . . . . ?
C6 C7 Fe1 C2 -122.5(2) . . . . ?
C8 C7 Fe1 C2 118.8(2) . . . . ?
C6 C7 Fe1 C9 81.2(2) . . . . ?
C8 C7 Fe1 C9 -37.5(2) . . . . ?
C6 C7 Fe1 C10 37.5(2) . . . . ?
C8 C7 Fe1 C10 -81.2(2) . . . . ?
C6 C7 Fe1 C8 118.7(3) . . . . ?
C9 C8 Fe1 C4 74.7(2) . . . . ?
C7 C8 Fe1 C4 -165.8(2) . . . . ?
C9 C8 Fe1 C1 -164.7(3) . . . . ?
C7 C8 Fe1 C1 -45.3(4) . . . . ?
C9 C8 Fe1 C6 -81.5(2) . . . . ?
C7 C8 Fe1 C6 37.9(2) . . . . ?
C9 C8 Fe1 C5 37.9(5) . . . . ?
C7 C8 Fe1 C5 157.3(4) . . . . ?
C9 C8 Fe1 C3 116.9(2) . . . . ?
C7 C8 Fe1 C3 -123.7(2) . . . . ?
C9 C8 Fe1 C2 160.0(2) . . . . ?
C7 C8 Fe1 C2 -80.6(2) . . . . ?
C7 C8 Fe1 C9 119.4(3) . . . . ?
C9 C8 Fe1 C10 -37.5(2) . . . . ?
C7 C8 Fe1 C10 81.9(2) . . . . ?
C9 C8 Fe1 C7 -119.4(3) . . . . ?
C25 C26 Fe2 C23 81.0(2) . . . . ?
C27 C26 Fe2 C23 -38.04(19) . . . . ?
C25 C26 Fe2 C32 -161.8(2) . . . . ?
C27 C26 Fe2 C32 79.1(2) . . . . ?
C25 C26 Fe2 C31 -120.4(2) . . . . ?
C27 C26 Fe2 C31 120.5(2) . . . . ?
C25 C26 Fe2 C28 167.5(4) . . . . ?
C27 C26 Fe2 C28 48.5(5) . . . . ?
C25 C26 Fe2 C29 -49.4(5) . . . . ?
C27 C26 Fe2 C29 -168.5(4) . . . . ?
C27 C26 Fe2 C25 -119.1(3) . . . . ?
C25 C26 Fe2 C27 119.1(3) . . . . ?
C25 C26 Fe2 C24 37.1(2) . . . . ?
C27 C26 Fe2 C24 -82.0(2) . . . . ?
C25 C26 Fe2 C30 -79.7(2) . . . . ?
C27 C26 Fe2 C30 161.3(2) . . . . ?
C27 C23 Fe2 C26 38.76(19) . . . . ?
O2 C23 Fe2 C26 155.4(3) . . . . ?
C24 C23 Fe2 C26 -82.1(2) . . . . ?
C27 C23 Fe2 C32 -74.8(2) . . . . ?
O2 C23 Fe2 C32 41.8(3) . . . . ?
C24 C23 Fe2 C32 164.3(2) . . . . ?
C27 C23 Fe2 C31 -38.9(5) . . . . ?
O2 C23 Fe2 C31 77.7(5) . . . . ?
C24 C23 Fe2 C31 -159.7(4) . . . . ?
C27 C23 Fe2 C28 -117.4(2) . . . . ?
O2 C23 Fe2 C28 -0.8(3) . . . . ?
C24 C23 Fe2 C28 121.7(2) . . . . ?
C27 C23 Fe2 C29 -160.2(2) . . . . ?
O2 C23 Fe2 C29 -43.6(3) . . . . ?
C24 C23 Fe2 C29 78.9(2) . . . . ?
C27 C23 Fe2 C25 82.7(2) . . . . ?
O2 C23 Fe2 C25 -160.7(3) . . . . ?
C24 C23 Fe2 C25 -38.18(19) . . . . ?
O2 C23 Fe2 C27 116.6(3) . . . . ?
C24 C23 Fe2 C27 -120.8(3) . . . . ?
C27 C23 Fe2 C24 120.8(3) . . . . ?
O2 C23 Fe2 C24 -122.5(3) . . . . ?
C27 C23 Fe2 C30 164.0(4) . . . . ?
O2 C23 Fe2 C30 -79.4(5) . . . . ?
C24 C23 Fe2 C30 43.1(5) . . . . ?
C31 C32 Fe2 C26 78.1(3) . . . . ?
C28 C32 Fe2 C26 -162.6(2) . . . . ?
C31 C32 Fe2 C23 161.1(2) . . . . ?
C28 C32 Fe2 C23 -79.6(3) . . . . ?
C28 C32 Fe2 C31 119.3(3) . . . . ?
C31 C32 Fe2 C28 -119.3(3) . . . . ?
C31 C32 Fe2 C29 -81.3(2) . . . . ?
C28 C32 Fe2 C29 38.0(2) . . . . ?
C31 C32 Fe2 C25 46.7(5) . . . . ?
C28 C32 Fe2 C25 166.0(3) . . . . ?
C31 C32 Fe2 C27 120.4(2) . . . . ?
C28 C32 Fe2 C27 -120.2(2) . . . . ?
C31 C32 Fe2 C24 -166.9(4) . . . . ?
C28 C32 Fe2 C24 -47.5(5) . . . . ?
C31 C32 Fe2 C30 -37.3(2) . . . . ?
C28 C32 Fe2 C30 82.0(2) . . . . ?
C30 C31 Fe2 C26 121.3(2) . . . . ?
C32 C31 Fe2 C26 -119.3(2) . . . . ?
C30 C31 Fe2 C23 -168.1(3) . . . . ?
C32 C31 Fe2 C23 -48.7(5) . . . . ?
C30 C31 Fe2 C32 -119.5(3) . . . . ?
C30 C31 Fe2 C28 -81.8(2) . . . . ?
C32 C31 Fe2 C28 37.7(2) . . . . ?
C30 C31 Fe2 C29 -37.6(2) . . . . ?
C32 C31 Fe2 C29 81.8(2) . . . . ?
C30 C31 Fe2 C25 80.0(2) . . . . ?
C32 C31 Fe2 C25 -160.5(2) . . . . ?
C30 C31 Fe2 C27 163.2(2) . . . . ?
C32 C31 Fe2 C27 -77.3(3) . . . . ?
C30 C31 Fe2 C24 49.0(5) . . . . ?
C32 C31 Fe2 C24 168.4(3) . . . . ?
C32 C31 Fe2 C30 119.5(3) . . . . ?
C32 C28 Fe2 C26 42.1(5) . . . . ?
C29 C28 Fe2 C26 161.1(3) . . . . ?
C32 C28 Fe2 C23 120.2(2) . . . . ?
C29 C28 Fe2 C23 -120.9(2) . . . . ?
C29 C28 Fe2 C32 118.9(3) . . . . ?
C32 C28 Fe2 C31 -37.5(2) . . . . ?
C29 C28 Fe2 C31 81.4(2) . . . . ?
C32 C28 Fe2 C29 -118.9(3) . . . . ?
C32 C28 Fe2 C25 -163.3(4) . . . . ?
C29 C28 Fe2 C25 -44.3(5) . . . . ?
C32 C28 Fe2 C27 77.6(3) . . . . ?
C29 C28 Fe2 C27 -163.5(2) . . . . ?
C32 C28 Fe2 C24 162.7(2) . . . . ?
C29 C28 Fe2 C24 -78.4(3) . . . . ?
C32 C28 Fe2 C30 -80.9(2) . . . . ?
C29 C28 Fe2 C30 38.0(2) . . . . ?
C28 C29 Fe2 C26 -159.4(4) . . . . ?
C30 C29 Fe2 C26 -40.8(5) . . . . ?
C28 C29 Fe2 C23 79.2(3) . . . . ?
C30 C29 Fe2 C23 -162.1(2) . . . . ?
C28 C29 Fe2 C32 -37.8(2) . . . . ?
C30 C29 Fe2 C32 80.8(2) . . . . ?
C28 C29 Fe2 C31 -81.5(2) . . . . ?
C30 C29 Fe2 C31 37.1(2) . . . . ?
C30 C29 Fe2 C28 118.7(3) . . . . ?
C28 C29 Fe2 C25 164.0(2) . . . . ?
C30 C29 Fe2 C25 -77.4(3) . . . . ?
C28 C29 Fe2 C27 41.9(5) . . . . ?
C30 C29 Fe2 C27 160.6(4) . . . . ?
C28 C29 Fe2 C24 121.7(2) . . . . ?
C30 C29 Fe2 C24 -119.6(2) . . . . ?
C28 C29 Fe2 C30 -118.7(3) . . . . ?
C24 C25 Fe2 C26 120.2(3) . . . . ?
C26 C25 Fe2 C23 -81.7(2) . . . . ?
C24 C25 Fe2 C23 38.44(19) . . . . ?
C26 C25 Fe2 C32 43.4(4) . . . . ?
C24 C25 Fe2 C32 163.6(3) . . . . ?
C26 C25 Fe2 C31 77.2(2) . . . . ?
C24 C25 Fe2 C31 -162.7(2) . . . . ?
C26 C25 Fe2 C28 -165.4(4) . . . . ?
C24 C25 Fe2 C28 -45.2(5) . . . . ?
C26 C25 Fe2 C29 161.1(2) . . . . ?
C24 C25 Fe2 C29 -78.7(2) . . . . ?
C26 C25 Fe2 C27 -38.1(2) . . . . ?
C24 C25 Fe2 C27 82.0(2) . . . . ?
C26 C25 Fe2 C24 -120.2(3) . . . . ?
C26 C25 Fe2 C30 119.1(2) . . . . ?
C24 C25 Fe2 C30 -120.8(2) . . . . ?
C23 C27 Fe2 C26 -118.0(3) . . . . ?
C26 C27 Fe2 C23 118.0(3) . . . . ?
C23 C27 Fe2 C32 123.2(2) . . . . ?
C26 C27 Fe2 C32 -118.7(2) . . . . ?
C23 C27 Fe2 C31 164.57(19) . . . . ?
C26 C27 Fe2 C31 -77.4(2) . . . . ?
C23 C27 Fe2 C28 81.7(2) . . . . ?
C26 C27 Fe2 C28 -160.3(2) . . . . ?
C23 C27 Fe2 C29 50.7(5) . . . . ?
C26 C27 Fe2 C29 168.7(4) . . . . ?
C23 C27 Fe2 C25 -80.4(2) . . . . ?
C26 C27 Fe2 C25 37.6(2) . . . . ?
C23 C27 Fe2 C24 -36.91(19) . . . . ?
C26 C27 Fe2 C24 81.1(2) . . . . ?
C23 C27 Fe2 C30 -165.2(4) . . . . ?
C26 C27 Fe2 C30 -47.2(5) . . . . ?
C25 C24 Fe2 C26 -37.15(19) . . . . ?
C23 C24 Fe2 C26 80.9(2) . . . . ?
C25 C24 Fe2 C23 -118.1(3) . . . . ?
C25 C24 Fe2 C32 -160.6(4) . . . . ?
C23 C24 Fe2 C32 -42.6(5) . . . . ?
C25 C24 Fe2 C31 42.6(5) . . . . ?
C23 C24 Fe2 C31 160.6(4) . . . . ?
C25 C24 Fe2 C28 163.6(2) . . . . ?
C23 C24 Fe2 C28 -78.4(2) . . . . ?
C25 C24 Fe2 C29 121.0(2) . . . . ?
C23 C24 Fe2 C29 -121.0(2) . . . . ?
C23 C24 Fe2 C25 118.1(3) . . . . ?
C25 C24 Fe2 C27 -81.5(2) . . . . ?
C23 C24 Fe2 C27 36.59(18) . . . . ?
C25 C24 Fe2 C30 78.2(2) . . . . ?
C23 C24 Fe2 C30 -163.8(2) . . . . ?
C31 C30 Fe2 C26 -76.2(3) . . . . ?
C29 C30 Fe2 C26 164.2(2) . . . . ?
C31 C30 Fe2 C23 167.5(4) . . . . ?
C29 C30 Fe2 C23 47.9(5) . . . . ?
C31 C30 Fe2 C32 37.6(2) . . . . ?
C29 C30 Fe2 C32 -82.1(2) . . . . ?
C29 C30 Fe2 C31 -119.6(3) . . . . ?
C31 C30 Fe2 C28 81.5(2) . . . . ?
C29 C30 Fe2 C28 -38.1(2) . . . . ?
C31 C30 Fe2 C29 119.6(3) . . . . ?
C31 C30 Fe2 C25 -118.4(2) . . . . ?
C29 C30 Fe2 C25 121.9(2) . . . . ?
C31 C30 Fe2 C27 -41.4(5) . . . . ?
C29 C30 Fe2 C27 -161.0(3) . . . . ?
C31 C30 Fe2 C24 -160.2(2) . . . . ?
C29 C30 Fe2 C24 80.1(2) . . . . ?
 
_diffrn_measured_fraction_theta_max    0.980
_diffrn_reflns_theta_full              26.00
_diffrn_measured_fraction_theta_full   0.980
_refine_diff_density_max    0.834
_refine_diff_density_min   -0.648
_refine_diff_density_rms    0.082

#===END

#=====================================================================
# cif data for "mk-226" (compound 18)
#=====================================================================

data_mk-226 
 
_audit_creation_method            SHELXL-97 
_chemical_name_systematic 
; 
 ? 
; 
_chemical_name_common             ? 
_chemical_melting_point           ? 
_chemical_formula_moiety          'C16 H19 P S'
_chemical_formula_sum 
 'C16 H19 P S' 
_chemical_formula_weight          274.34 
 
loop_ 
 _atom_type_symbol 
 _atom_type_description 
 _atom_type_scat_dispersion_real 
 _atom_type_scat_dispersion_imag 
 _atom_type_scat_source 
 'C'  'C'   0.0033   0.0016 
 'International Tables Vol C Tables 4.2.6.8 and 6.1.1.4' 
 'P'  'P'   0.1023   0.0942 
 'International Tables Vol C Tables 4.2.6.8 and 6.1.1.4' 
 'S'  'S'   0.1246   0.1234 
 'International Tables Vol C Tables 4.2.6.8 and 6.1.1.4' 
 'H'  'H'   0.0000   0.0000 
 'International Tables Vol C Tables 4.2.6.8 and 6.1.1.4' 
 
_symmetry_cell_setting            'triclinic' 
_symmetry_space_group_name_H-M    'P -1' 
_symmetry_space_group_name_Hall   '-P 1'
 
loop_ 
 _symmetry_equiv_pos_as_xyz 
 'x, y, z' 
 '-x, -y, -z' 
 
_cell_length_a                    9.1715(7) 
_cell_length_b                    11.9513(8) 
_cell_length_c                    13.8640(10) 
_cell_angle_alpha                 86.089(6) 
_cell_angle_beta                  88.870(6) 
_cell_angle_gamma                 76.849(6) 
_cell_volume                      1476.34(18) 
_cell_formula_units_Z             4 
_cell_measurement_temperature   110.00(10) 
_cell_measurement_reflns_used   4482
_cell_measurement_theta_min     3.5360
_cell_measurement_theta_max     28.8710
 
_exptl_crystal_description        'block' 
_exptl_crystal_colour             'colorless' 
_exptl_crystal_size_max           0.4 
_exptl_crystal_size_mid           0.4 
_exptl_crystal_size_min           0.4 
_exptl_crystal_density_meas       ? 
_exptl_crystal_density_diffrn     1.234 
_exptl_crystal_density_method     'not measured' 
_exptl_crystal_F_000              584 
_exptl_absorpt_coefficient_mu     0.308 
_exptl_absorpt_correction_T_min                   0.61599
_exptl_absorpt_correction_T_max                   1.00000
_exptl_absorpt_correction_type            'multi-scan'
_exptl_absorpt_process_details
;
CrysAlisPro, Agilent Technologies,
Version 1.171.36.28 (release 01-02-2013 CrysAlis171 .NET)
(compiled Feb  1 2013,16:14:44)
Empirical absorption correction using spherical harmonics,
 implemented in SCALE3 ABSPACK scaling algorithm.
;
 
_exptl_special_details 
; 
 
; 
 
_diffrn_ambient_temperature       110.00(10)
_diffrn_radiation_wavelength      0.71073 
_diffrn_radiation_type            MoK\a 
_diffrn_radiation_source          'fine-focus sealed tube' 
_diffrn_radiation_monochromator   graphite 
_diffrn_measurement_device_type   'oxford gemini s' 
_diffrn_measurement_method        '\w scans' 
_diffrn_detector_area_resol_mean  ? 
_diffrn_standards_number          2 
_diffrn_standards_interval_count  50
_diffrn_standards_interval_time   10 
_diffrn_standards_decay_%         0 
_diffrn_reflns_number             9738 
_diffrn_reflns_av_R_equivalents   0.0700 
_diffrn_reflns_av_sigmaI/netI     0.0817 
_diffrn_reflns_limit_h_min        -10 
_diffrn_reflns_limit_h_max        10 
_diffrn_reflns_limit_k_min        -14 
_diffrn_reflns_limit_k_max        13 
_diffrn_reflns_limit_l_min        -16 
_diffrn_reflns_limit_l_max        11 
_diffrn_reflns_theta_min          3.00 
_diffrn_reflns_theta_max          25.00 
_reflns_number_total              5158 
_reflns_number_gt                 4291 
_reflns_threshold_expression      >2sigma(I) 
 
_computing_data_collection
;
CrysAlisPro, Agilent Technologies,
Version 1.171.36.28 (release 01-02-2013 CrysAlis171 .NET)
(compiled Feb  1 2013,16:14:44)
;
_computing_cell_refinement
;
CrysAlisPro, Agilent Technologies,
Version 1.171.36.28 (release 01-02-2013 CrysAlis171 .NET)
(compiled Feb  1 2013,16:14:44)
;
_computing_data_reduction
;
CrysAlisPro, Agilent Technologies,
Version 1.171.36.28 (release 01-02-2013 CrysAlis171 .NET)
(compiled Feb  1 2013,16:14:44)
;
_computing_structure_solution     'SHELXS-97 (Sheldrick, 1990)' 
_computing_structure_refinement   'SHELXL-97 (Sheldrick, 1997)' 
_computing_molecular_graphics     ? 
_computing_publication_material   ? 
 
_refine_special_details 
; 
 Refinement of F^2^ against ALL reflections.  The weighted R-factor wR and 
 goodness of fit S are based on F^2^, conventional R-factors R are based 
 on F, with F set to zero for negative F^2^. The threshold expression of 
 F^2^ > 2sigma(F^2^) is used only for calculating R-factors(gt) etc. and is 
 not relevant to the choice of reflections for refinement.  R-factors based 
 on F^2^ are statistically about twice as large as those based on F, and R- 
 factors based on ALL data will be even larger. 
; 
 
_refine_ls_structure_factor_coef  Fsqd  
_refine_ls_matrix_type            full 
_refine_ls_weighting_scheme       calc  
_refine_ls_weighting_details 
 'calc w=1/[\s^2^(Fo^2^)+(0.1690P)^2^+0.2517P] where P=(Fo^2^+2Fc^2^)/3' 
_atom_sites_solution_primary      direct 
_atom_sites_solution_secondary    difmap 
_atom_sites_solution_hydrogens    geom 
_refine_ls_hydrogen_treatment     constr 
_refine_ls_extinction_method      none 
_refine_ls_extinction_coef        ? 
_refine_ls_number_reflns          5158 
_refine_ls_number_parameters      327 
_refine_ls_number_restraints      19 
_refine_ls_R_factor_all           0.1004 
_refine_ls_R_factor_gt            0.0907 
_refine_ls_wR_factor_ref          0.2484 
_refine_ls_wR_factor_gt           0.2353 
_refine_ls_goodness_of_fit_ref    1.058 
_refine_ls_restrained_S_all       1.057 
_refine_ls_shift/su_max           0.000 
_refine_ls_shift/su_mean          0.000 
 
loop_ 
 _atom_site_label 
 _atom_site_type_symbol 
 _atom_site_fract_x 
 _atom_site_fract_y 
 _atom_site_fract_z 
 _atom_site_U_iso_or_equiv 
 _atom_site_adp_type 
 _atom_site_occupancy 
 _atom_site_symmetry_multiplicity 
 _atom_site_calc_flag 
 _atom_site_refinement_flags 
 _atom_site_disorder_assembly 
 _atom_site_disorder_group 
C1 C 0.4555(4) 0.2391(3) 0.1168(2) 0.0275(9) Uani 1 1 d . . . 
H1A H 0.5467 0.2646 0.1226 0.041 Uiso 1 1 calc R . . 
H1B H 0.4014 0.2782 0.0611 0.041 Uiso 1 1 calc R . . 
H1C H 0.4786 0.1576 0.1099 0.041 Uiso 1 1 calc R . . 
C2 C 0.3597(4) 0.2660(3) 0.2072(2) 0.0214(8) Uani 1 1 d . . . 
H2 H 0.3382 0.3494 0.2131 0.026 Uiso 1 1 calc R . . 
C3 C 0.2095(4) 0.2296(3) 0.2027(3) 0.0256(8) Uani 1 1 d . . . 
H3A H 0.2281 0.1509 0.1838 0.031 Uiso 1 1 calc R . . 
H3B H 0.1645 0.2316 0.2666 0.031 Uiso 1 1 calc R . . 
C4 C 0.1004(4) 0.3064(4) 0.1322(3) 0.0369(10) Uani 1 1 d . . . 
H4A H 0.0093 0.2798 0.1317 0.055 Uiso 1 1 calc R . . 
H4B H 0.1437 0.3041 0.0685 0.055 Uiso 1 1 calc R . . 
H4C H 0.0791 0.3841 0.1516 0.055 Uiso 1 1 calc R . . 
C5 C 0.3410(4) 0.2494(3) 0.4150(2) 0.0219(8) Uani 1 1 d . . . 
C6 C 0.2763(4) 0.3671(3) 0.4180(3) 0.0257(8) Uani 1 1 d . . . 
H6 H 0.2928 0.4184 0.3677 0.031 Uiso 1 1 calc R . . 
C7 C 0.1876(4) 0.4068(3) 0.4959(3) 0.0292(9) Uani 1 1 d . . . 
H7 H 0.1469 0.4853 0.4987 0.035 Uiso 1 1 calc R . . 
C8 C 0.1589(4) 0.3309(4) 0.5695(3) 0.0323(9) Uani 1 1 d . . . 
H8 H 0.0968 0.3579 0.6208 0.039 Uiso 1 1 calc R . . 
C9 C 0.2222(4) 0.2158(3) 0.5668(3) 0.0293(9) Uani 1 1 d . . . 
H9 H 0.2039 0.1650 0.6169 0.035 Uiso 1 1 calc R . . 
C10 C 0.3133(4) 0.1740(3) 0.4902(2) 0.0244(8) Uani 1 1 d . . . 
H10 H 0.3557 0.0956 0.4892 0.029 Uiso 1 1 calc R . . 
C11 C 0.6220(4) 0.2592(3) 0.3241(2) 0.0223(8) Uani 1 1 d . . . 
C12 C 0.6099(4) 0.3774(3) 0.3058(3) 0.0279(8) Uani 1 1 d . . . 
H12 H 0.5195 0.4246 0.2849 0.034 Uiso 1 1 calc R . . 
C13 C 0.7325(4) 0.4244(4) 0.3188(3) 0.0323(9) Uani 1 1 d . . . 
H13 H 0.7235 0.5031 0.3066 0.039 Uiso 1 1 calc R . . 
C14 C 0.8674(4) 0.3560(4) 0.3497(3) 0.0317(9) Uani 1 1 d . . . 
H14 H 0.9491 0.3882 0.3581 0.038 Uiso 1 1 calc R . . 
C15 C 0.8802(4) 0.2385(4) 0.3681(3) 0.0345(10) Uani 1 1 d . . . 
H15 H 0.9711 0.1921 0.3891 0.041 Uiso 1 1 calc R . . 
C16 C 0.7591(4) 0.1897(3) 0.3554(3) 0.0291(9) Uani 1 1 d . . . 
H16 H 0.7689 0.1109 0.3677 0.035 Uiso 1 1 calc R . . 
C17 C 0.3682(7) -0.2886(4) 0.3772(3) 0.0592(15) Uani 1 1 d U . . 
H17A H 0.4709 -0.3217 0.3622 0.089 Uiso 1 1 calc R . . 
H17B H 0.3141 -0.3486 0.3862 0.089 Uiso 1 1 calc R . . 
H17C H 0.3632 -0.2489 0.4355 0.089 Uiso 1 1 calc R . . 
C18 C 0.2951(5) -0.1995(3) 0.2900(3) 0.0317(9) Uani 1 1 d U . . 
H18 H 0.3529 -0.1398 0.2822 0.038 Uiso 1 1 calc R . . 
C19 C 0.1341(5) -0.1405(5) 0.3052(4) 0.0528(14) Uani 1 1 d . . . 
H19A H 0.0955 -0.0962 0.2463 0.063 Uiso 1 1 calc R . . 
H19B H 0.0760 -0.1982 0.3190 0.063 Uiso 1 1 calc R . . 
C20 C 0.1153(6) -0.0621(4) 0.3868(4) 0.0534(13) Uani 1 1 d . . . 
H20A H 0.0114 -0.0253 0.3935 0.080 Uiso 1 1 calc R . . 
H20B H 0.1723 -0.0047 0.3733 0.080 Uiso 1 1 calc R . . 
H20C H 0.1501 -0.1062 0.4457 0.080 Uiso 1 1 calc R . . 
C21 C 0.5125(4) -0.3287(3) 0.1564(2) 0.0253(8) Uani 1 1 d . . . 
C22 C 0.5590(4) -0.4276(3) 0.1064(2) 0.0277(9) Uani 1 1 d . . . 
H22 H 0.4887 -0.4675 0.0888 0.033 Uiso 1 1 calc R . . 
C23 C 0.7084(5) -0.4679(4) 0.0820(3) 0.0344(10) Uani 1 1 d . . . 
H23 H 0.7377 -0.5341 0.0484 0.041 Uiso 1 1 calc R . . 
C24 C 0.8138(4) -0.4089(3) 0.1081(3) 0.0328(9) Uani 1 1 d . . . 
H24 H 0.9142 -0.4357 0.0926 0.039 Uiso 1 1 calc R . . 
C25 C 0.7686(4) -0.3093(3) 0.1578(3) 0.0311(9) Uani 1 1 d . . . 
H25 H 0.8391 -0.2694 0.1752 0.037 Uiso 1 1 calc R . . 
C26 C 0.6206(4) -0.2696(3) 0.1812(2) 0.0263(8) Uani 1 1 d . . . 
H26 H 0.5917 -0.2027 0.2140 0.032 Uiso 1 1 calc R . . 
C27 C 0.2588(4) -0.1638(3) 0.0800(2) 0.0221(8) Uani 1 1 d . . . 
C28 C 0.3189(4) -0.0668(3) 0.0728(3) 0.0256(8) Uani 1 1 d . . . 
H28 H 0.3817 -0.0546 0.1209 0.031 Uiso 1 1 calc R . . 
C29 C 0.2848(4) 0.0127(3) -0.0071(3) 0.0305(9) Uani 1 1 d . . . 
H29 H 0.3247 0.0778 -0.0119 0.037 Uiso 1 1 calc R . . 
C30 C 0.1924(5) -0.0055(3) -0.0784(3) 0.0331(9) Uani 1 1 d . . . 
H30 H 0.1710 0.0467 -0.1319 0.040 Uiso 1 1 calc R . . 
C31 C 0.1311(5) -0.1016(4) -0.0708(3) 0.0356(10) Uani 1 1 d . . . 
H31 H 0.0677 -0.1129 -0.1190 0.043 Uiso 1 1 calc R . . 
C32 C 0.1631(4) -0.1805(3) 0.0075(3) 0.0285(9) Uani 1 1 d . . . 
H32 H 0.1213 -0.2446 0.0121 0.034 Uiso 1 1 calc R . . 
P1 P 0.46190(10) 0.19592(7) 0.31451(6) 0.0191(3) Uani 1 1 d . . . 
P2 P 0.31412(10) -0.27442(8) 0.17823(6) 0.0233(3) Uani 1 1 d . . . 
S1 S 0.51634(10) 0.02750(8) 0.31609(6) 0.0261(3) Uani 1 1 d . . . 
S2 S 0.20204(11) -0.39638(8) 0.18141(7) 0.0307(3) Uani 1 1 d . . . 
 
loop_ 
 _atom_site_aniso_label 
 _atom_site_aniso_U_11 
 _atom_site_aniso_U_22 
 _atom_site_aniso_U_33 
 _atom_site_aniso_U_23 
 _atom_site_aniso_U_13 
 _atom_site_aniso_U_12 
C1 0.024(2) 0.038(2) 0.0201(18) -0.0086(15) -0.0008(14) -0.0041(16) 
C2 0.0229(19) 0.0235(19) 0.0175(17) -0.0051(13) -0.0061(13) -0.0033(14) 
C3 0.029(2) 0.027(2) 0.0218(18) -0.0088(14) -0.0050(14) -0.0060(16) 
C4 0.033(2) 0.040(2) 0.039(2) 0.0002(19) -0.0144(18) -0.0113(18) 
C5 0.0231(19) 0.030(2) 0.0144(16) -0.0082(14) -0.0052(13) -0.0071(15) 
C6 0.031(2) 0.030(2) 0.0178(18) -0.0060(14) -0.0016(14) -0.0082(16) 
C7 0.030(2) 0.033(2) 0.0245(19) -0.0161(16) 0.0017(15) -0.0017(16) 
C8 0.029(2) 0.047(3) 0.0210(19) -0.0096(17) -0.0007(15) -0.0063(18) 
C9 0.029(2) 0.041(2) 0.0192(18) -0.0024(16) -0.0003(15) -0.0099(17) 
C10 0.026(2) 0.029(2) 0.0193(17) -0.0048(14) -0.0028(14) -0.0077(15) 
C11 0.0242(19) 0.033(2) 0.0120(16) -0.0092(14) -0.0002(13) -0.0085(15) 
C12 0.029(2) 0.029(2) 0.027(2) -0.0066(15) -0.0029(15) -0.0074(16) 
C13 0.032(2) 0.037(2) 0.032(2) -0.0083(17) 0.0022(17) -0.0152(18) 
C14 0.027(2) 0.050(3) 0.0236(19) -0.0145(17) 0.0012(15) -0.0164(18) 
C15 0.020(2) 0.051(3) 0.031(2) -0.0075(18) -0.0052(15) -0.0044(18) 
C16 0.028(2) 0.031(2) 0.0255(19) -0.0048(16) 0.0009(15) -0.0010(16) 
C17 0.102(4) 0.068(3) 0.022(2) -0.022(2) 0.010(2) -0.046(3) 
C18 0.044(2) 0.035(2) 0.0215(19) -0.0131(16) 0.0045(16) -0.0185(18) 
C19 0.040(3) 0.080(4) 0.048(3) -0.040(3) 0.016(2) -0.026(3) 
C20 0.053(3) 0.056(3) 0.050(3) -0.023(2) 0.002(2) -0.004(2) 
C21 0.036(2) 0.026(2) 0.0125(16) -0.0017(14) -0.0045(14) -0.0042(16) 
C22 0.034(2) 0.028(2) 0.0203(18) -0.0019(15) -0.0105(15) -0.0055(16) 
C23 0.044(3) 0.034(2) 0.0203(19) -0.0100(16) -0.0049(16) 0.0037(18) 
C24 0.028(2) 0.039(2) 0.029(2) -0.0025(17) -0.0016(16) -0.0007(17) 
C25 0.031(2) 0.030(2) 0.029(2) 0.0032(16) -0.0083(16) -0.0035(17) 
C26 0.034(2) 0.025(2) 0.0220(19) -0.0043(15) -0.0046(15) -0.0103(16) 
C27 0.0215(19) 0.0238(19) 0.0197(18) -0.0070(14) 0.0041(13) -0.0011(14) 
C28 0.028(2) 0.026(2) 0.0226(18) -0.0074(14) -0.0025(15) -0.0039(15) 
C29 0.033(2) 0.026(2) 0.034(2) -0.0071(16) 0.0006(17) -0.0087(16) 
C30 0.041(2) 0.029(2) 0.027(2) -0.0008(16) -0.0049(17) -0.0037(18) 
C31 0.039(2) 0.039(2) 0.031(2) -0.0054(17) -0.0147(18) -0.0111(19) 
C32 0.028(2) 0.027(2) 0.032(2) -0.0074(16) -0.0058(16) -0.0069(16) 
P1 0.0225(6) 0.0204(5) 0.0149(5) -0.0059(4) -0.0027(4) -0.0042(4) 
P2 0.0274(6) 0.0270(6) 0.0181(5) -0.0079(4) -0.0029(4) -0.0095(4) 
S1 0.0325(6) 0.0206(5) 0.0244(5) -0.0057(4) -0.0034(4) -0.0028(4) 
S2 0.0365(6) 0.0309(6) 0.0297(6) -0.0068(4) -0.0046(4) -0.0164(4) 
 
_geom_special_details 
; 
 All esds (except the esd in the dihedral angle between two l.s. planes) 
 are estimated using the full covariance matrix.  The cell esds are taken 
 into account individually in the estimation of esds in distances, angles 
 and torsion angles; correlations between esds in cell parameters are only 
 used when they are defined by crystal symmetry.  An approximate (isotropic) 
 treatment of cell esds is used for estimating esds involving l.s. planes. 
; 
 
loop_ 
 _geom_bond_atom_site_label_1 
 _geom_bond_atom_site_label_2 
 _geom_bond_distance 
 _geom_bond_site_symmetry_2 
 _geom_bond_publ_flag 
C1 C2 1.525(5) . ? 
C1 H1A 0.9600 . ? 
C1 H1B 0.9600 . ? 
C1 H1C 0.9600 . ? 
C2 C3 1.539(5) . ? 
C2 P1 1.823(3) . ? 
C2 H2 0.9800 . ? 
C3 C4 1.516(5) . ? 
C3 H3A 0.9700 . ? 
C3 H3B 0.9700 . ? 
C4 H4A 0.9600 . ? 
C4 H4B 0.9600 . ? 
C4 H4C 0.9600 . ? 
C5 C10 1.389(5) . ? 
C5 C6 1.399(5) . ? 
C5 P1 1.821(4) . ? 
C6 C7 1.384(5) . ? 
C6 H6 0.9300 . ? 
C7 C8 1.381(5) . ? 
C7 H7 0.9300 . ? 
C8 C9 1.369(5) . ? 
C8 H8 0.9300 . ? 
C9 C10 1.386(5) . ? 
C9 H9 0.9300 . ? 
C10 H10 0.9300 . ? 
C11 C12 1.397(5) . ? 
C11 C16 1.398(5) . ? 
C11 P1 1.809(4) . ? 
C12 C13 1.386(5) . ? 
C12 H12 0.9300 . ? 
C13 C14 1.376(6) . ? 
C13 H13 0.9300 . ? 
C14 C15 1.388(6) . ? 
C14 H14 0.9300 . ? 
C15 C16 1.387(6) . ? 
C15 H15 0.9300 . ? 
C16 H16 0.9300 . ? 
C17 C18 1.605(6) . ? 
C17 H17A 0.9600 . ? 
C17 H17B 0.9600 . ? 
C17 H17C 0.9600 . ? 
C18 C19 1.503(6) . ? 
C18 P2 1.828(4) . ? 
C18 H18 0.9800 . ? 
C19 C20 1.500(6) . ? 
C19 H19A 0.9700 . ? 
C19 H19B 0.9700 . ? 
C20 H20A 0.9600 . ? 
C20 H20B 0.9600 . ? 
C20 H20C 0.9600 . ? 
C21 C22 1.390(5) . ? 
C21 C26 1.402(5) . ? 
C21 P2 1.814(4) . ? 
C22 C23 1.388(6) . ? 
C22 H22 0.9300 . ? 
C23 C24 1.386(6) . ? 
C23 H23 0.9300 . ? 
C24 C25 1.392(6) . ? 
C24 H24 0.9300 . ? 
C25 C26 1.372(5) . ? 
C25 H25 0.9300 . ? 
C26 H26 0.9300 . ? 
C27 C28 1.390(5) . ? 
C27 C32 1.401(5) . ? 
C27 P2 1.827(3) . ? 
C28 C29 1.400(5) . ? 
C28 H28 0.9300 . ? 
C29 C30 1.374(6) . ? 
C29 H29 0.9300 . ? 
C30 C31 1.386(6) . ? 
C30 H30 0.9300 . ? 
C31 C32 1.378(5) . ? 
C31 H31 0.9300 . ? 
C32 H32 0.9300 . ? 
P1 S1 1.9592(13) . ? 
P2 S2 1.9632(13) . ? 
 
loop_ 
 _geom_angle_atom_site_label_1 
 _geom_angle_atom_site_label_2 
 _geom_angle_atom_site_label_3 
 _geom_angle 
 _geom_angle_site_symmetry_1 
 _geom_angle_site_symmetry_3 
 _geom_angle_publ_flag 
C2 C1 H1A 109.5 . . ? 
C2 C1 H1B 109.5 . . ? 
H1A C1 H1B 109.5 . . ? 
C2 C1 H1C 109.5 . . ? 
H1A C1 H1C 109.5 . . ? 
H1B C1 H1C 109.5 . . ? 
C1 C2 C3 112.7(3) . . ? 
C1 C2 P1 110.3(2) . . ? 
C3 C2 P1 109.4(2) . . ? 
C1 C2 H2 108.1 . . ? 
C3 C2 H2 108.1 . . ? 
P1 C2 H2 108.1 . . ? 
C4 C3 C2 112.8(3) . . ? 
C4 C3 H3A 109.0 . . ? 
C2 C3 H3A 109.0 . . ? 
C4 C3 H3B 109.0 . . ? 
C2 C3 H3B 109.0 . . ? 
H3A C3 H3B 107.8 . . ? 
C3 C4 H4A 109.5 . . ? 
C3 C4 H4B 109.5 . . ? 
H4A C4 H4B 109.5 . . ? 
C3 C4 H4C 109.5 . . ? 
H4A C4 H4C 109.5 . . ? 
H4B C4 H4C 109.5 . . ? 
C10 C5 C6 119.2(3) . . ? 
C10 C5 P1 120.3(3) . . ? 
C6 C5 P1 120.4(3) . . ? 
C7 C6 C5 119.8(3) . . ? 
C7 C6 H6 120.1 . . ? 
C5 C6 H6 120.1 . . ? 
C8 C7 C6 120.5(4) . . ? 
C8 C7 H7 119.8 . . ? 
C6 C7 H7 119.8 . . ? 
C9 C8 C7 119.7(4) . . ? 
C9 C8 H8 120.1 . . ? 
C7 C8 H8 120.1 . . ? 
C8 C9 C10 120.9(3) . . ? 
C8 C9 H9 119.6 . . ? 
C10 C9 H9 119.6 . . ? 
C9 C10 C5 119.8(3) . . ? 
C9 C10 H10 120.1 . . ? 
C5 C10 H10 120.1 . . ? 
C12 C11 C16 119.1(3) . . ? 
C12 C11 P1 121.4(3) . . ? 
C16 C11 P1 119.4(3) . . ? 
C13 C12 C11 120.1(4) . . ? 
C13 C12 H12 119.9 . . ? 
C11 C12 H12 119.9 . . ? 
C14 C13 C12 120.8(4) . . ? 
C14 C13 H13 119.6 . . ? 
C12 C13 H13 119.6 . . ? 
C13 C14 C15 119.4(4) . . ? 
C13 C14 H14 120.3 . . ? 
C15 C14 H14 120.3 . . ? 
C16 C15 C14 120.7(4) . . ? 
C16 C15 H15 119.6 . . ? 
C14 C15 H15 119.6 . . ? 
C15 C16 C11 119.9(4) . . ? 
C15 C16 H16 120.1 . . ? 
C11 C16 H16 120.1 . . ? 
C18 C17 H17A 109.5 . . ? 
C18 C17 H17B 109.5 . . ? 
H17A C17 H17B 109.5 . . ? 
C18 C17 H17C 109.5 . . ? 
H17A C17 H17C 109.5 . . ? 
H17B C17 H17C 109.5 . . ? 
C19 C18 C17 114.7(4) . . ? 
C19 C18 P2 109.7(3) . . ? 
C17 C18 P2 109.1(3) . . ? 
C19 C18 H18 107.7 . . ? 
C17 C18 H18 107.7 . . ? 
P2 C18 H18 107.7 . . ? 
C20 C19 C18 112.0(4) . . ? 
C20 C19 H19A 109.2 . . ? 
C18 C19 H19A 109.2 . . ? 
C20 C19 H19B 109.2 . . ? 
C18 C19 H19B 109.2 . . ? 
H19A C19 H19B 107.9 . . ? 
C19 C20 H20A 109.5 . . ? 
C19 C20 H20B 109.5 . . ? 
H20A C20 H20B 109.5 . . ? 
C19 C20 H20C 109.5 . . ? 
H20A C20 H20C 109.5 . . ? 
H20B C20 H20C 109.5 . . ? 
C22 C21 C26 118.2(3) . . ? 
C22 C21 P2 119.2(3) . . ? 
C26 C21 P2 122.5(3) . . ? 
C23 C22 C21 121.3(4) . . ? 
C23 C22 H22 119.4 . . ? 
C21 C22 H22 119.4 . . ? 
C24 C23 C22 119.6(4) . . ? 
C24 C23 H23 120.2 . . ? 
C22 C23 H23 120.2 . . ? 
C23 C24 C25 119.7(4) . . ? 
C23 C24 H24 120.1 . . ? 
C25 C24 H24 120.1 . . ? 
C26 C25 C24 120.4(4) . . ? 
C26 C25 H25 119.8 . . ? 
C24 C25 H25 119.8 . . ? 
C25 C26 C21 120.8(4) . . ? 
C25 C26 H26 119.6 . . ? 
C21 C26 H26 119.6 . . ? 
C28 C27 C32 119.5(3) . . ? 
C28 C27 P2 120.6(3) . . ? 
C32 C27 P2 119.8(3) . . ? 
C27 C28 C29 119.9(4) . . ? 
C27 C28 H28 120.0 . . ? 
C29 C28 H28 120.0 . . ? 
C30 C29 C28 120.0(4) . . ? 
C30 C29 H29 120.0 . . ? 
C28 C29 H29 120.0 . . ? 
C29 C30 C31 120.2(4) . . ? 
C29 C30 H30 119.9 . . ? 
C31 C30 H30 119.9 . . ? 
C32 C31 C30 120.6(4) . . ? 
C32 C31 H31 119.7 . . ? 
C30 C31 H31 119.7 . . ? 
C31 C32 C27 119.8(4) . . ? 
C31 C32 H32 120.1 . . ? 
C27 C32 H32 120.1 . . ? 
C11 P1 C5 104.42(16) . . ? 
C11 P1 C2 106.50(16) . . ? 
C5 P1 C2 104.41(16) . . ? 
C11 P1 S1 113.06(13) . . ? 
C5 P1 S1 113.22(12) . . ? 
C2 P1 S1 114.33(12) . . ? 
C21 P2 C27 103.25(15) . . ? 
C21 P2 C18 107.56(18) . . ? 
C27 P2 C18 106.48(17) . . ? 
C21 P2 S2 112.36(13) . . ? 
C27 P2 S2 113.68(13) . . ? 
C18 P2 S2 112.84(13) . . ? 
 
loop_ 
 _geom_torsion_atom_site_label_1 
 _geom_torsion_atom_site_label_2 
 _geom_torsion_atom_site_label_3 
 _geom_torsion_atom_site_label_4 
 _geom_torsion 
 _geom_torsion_site_symmetry_1 
 _geom_torsion_site_symmetry_2 
 _geom_torsion_site_symmetry_3 
 _geom_torsion_site_symmetry_4 
 _geom_torsion_publ_flag 
C1 C2 C3 C4 -72.1(4) . . . . ? 
P1 C2 C3 C4 164.8(3) . . . . ? 
C10 C5 C6 C7 0.9(5) . . . . ? 
P1 C5 C6 C7 -178.5(3) . . . . ? 
C5 C6 C7 C8 -1.9(6) . . . . ? 
C6 C7 C8 C9 1.9(6) . . . . ? 
C7 C8 C9 C10 -0.9(6) . . . . ? 
C8 C9 C10 C5 0.0(6) . . . . ? 
C6 C5 C10 C9 0.1(5) . . . . ? 
P1 C5 C10 C9 179.4(3) . . . . ? 
C16 C11 C12 C13 -0.1(5) . . . . ? 
P1 C11 C12 C13 176.5(3) . . . . ? 
C11 C12 C13 C14 0.1(6) . . . . ? 
C12 C13 C14 C15 -0.2(6) . . . . ? 
C13 C14 C15 C16 0.2(6) . . . . ? 
C14 C15 C16 C11 -0.2(6) . . . . ? 
C12 C11 C16 C15 0.1(5) . . . . ? 
P1 C11 C16 C15 -176.5(3) . . . . ? 
C17 C18 C19 C20 66.1(6) . . . . ? 
P2 C18 C19 C20 -170.7(4) . . . . ? 
C26 C21 C22 C23 0.5(5) . . . . ? 
P2 C21 C22 C23 175.5(3) . . . . ? 
C21 C22 C23 C24 0.1(5) . . . . ? 
C22 C23 C24 C25 -0.5(5) . . . . ? 
C23 C24 C25 C26 0.2(5) . . . . ? 
C24 C25 C26 C21 0.5(5) . . . . ? 
C22 C21 C26 C25 -0.8(5) . . . . ? 
P2 C21 C26 C25 -175.6(3) . . . . ? 
C32 C27 C28 C29 -0.6(5) . . . . ? 
P2 C27 C28 C29 174.8(3) . . . . ? 
C27 C28 C29 C30 -0.2(6) . . . . ? 
C28 C29 C30 C31 0.9(6) . . . . ? 
C29 C30 C31 C32 -0.7(6) . . . . ? 
C30 C31 C32 C27 -0.1(6) . . . . ? 
C28 C27 C32 C31 0.8(5) . . . . ? 
P2 C27 C32 C31 -174.7(3) . . . . ? 
C12 C11 P1 C5 -68.9(3) . . . . ? 
C16 C11 P1 C5 107.6(3) . . . . ? 
C12 C11 P1 C2 41.2(3) . . . . ? 
C16 C11 P1 C2 -142.3(3) . . . . ? 
C12 C11 P1 S1 167.6(3) . . . . ? 
C16 C11 P1 S1 -15.9(3) . . . . ? 
C10 C5 P1 C11 -114.5(3) . . . . ? 
C6 C5 P1 C11 64.8(3) . . . . ? 
C10 C5 P1 C2 133.9(3) . . . . ? 
C6 C5 P1 C2 -46.8(3) . . . . ? 
C10 C5 P1 S1 8.9(3) . . . . ? 
C6 C5 P1 S1 -171.8(2) . . . . ? 
C1 C2 P1 C11 63.8(3) . . . . ? 
C3 C2 P1 C11 -171.6(2) . . . . ? 
C1 C2 P1 C5 174.0(3) . . . . ? 
C3 C2 P1 C5 -61.5(3) . . . . ? 
C1 C2 P1 S1 -61.8(3) . . . . ? 
C3 C2 P1 S1 62.8(3) . . . . ? 
C22 C21 P2 C27 -96.5(3) . . . . ? 
C26 C21 P2 C27 78.3(3) . . . . ? 
C22 C21 P2 C18 151.2(3) . . . . ? 
C26 C21 P2 C18 -34.1(3) . . . . ? 
C22 C21 P2 S2 26.4(3) . . . . ? 
C26 C21 P2 S2 -158.9(3) . . . . ? 
C28 C27 P2 C21 -63.3(3) . . . . ? 
C32 C27 P2 C21 112.1(3) . . . . ? 
C28 C27 P2 C18 49.8(3) . . . . ? 
C32 C27 P2 C18 -134.7(3) . . . . ? 
C28 C27 P2 S2 174.7(2) . . . . ? 
C32 C27 P2 S2 -9.9(3) . . . . ? 
C19 C18 P2 C21 173.2(3) . . . . ? 
C17 C18 P2 C21 -60.3(3) . . . . ? 
C19 C18 P2 C27 63.1(3) . . . . ? 
C17 C18 P2 C27 -170.5(3) . . . . ? 
C19 C18 P2 S2 -62.3(3) . . . . ? 
C17 C18 P2 S2 64.1(3) . . . . ? 
 
_diffrn_measured_fraction_theta_max    0.992 
_diffrn_reflns_theta_full              25.00 
_diffrn_measured_fraction_theta_full   0.992 
_refine_diff_density_max    1.776 
_refine_diff_density_min   -0.762 
_refine_diff_density_rms    0.162 

#===END
